# Supplementary material for: Design, Synthesis and Biological Evaluation of Novel 4-Substituted Coumarin Derivatives as Antitumor Agents
Source: PubMed Central journal article supplement (PMC6225359; doi:10.3390/molecules23092281), 2018-09-06

## Characterization data:

5a

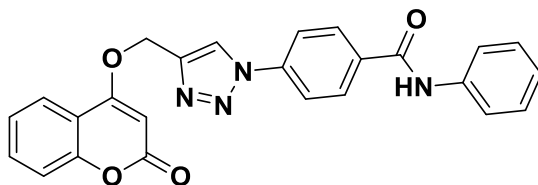

4-(4-(((2-oxo-2H-chromen-4-yl)oxy)methyl)-1H-1,2,3-triazol-1-yl)-N-phenylbenzamide

## HRMS of 5a

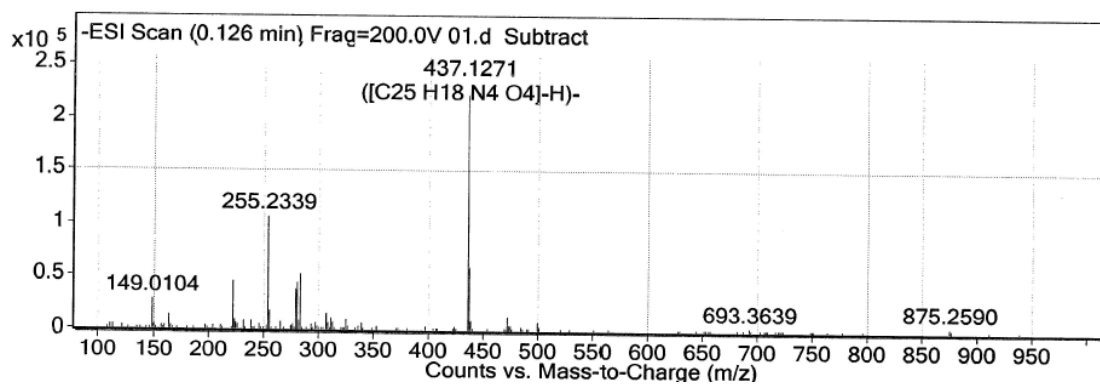

## <sup>1</sup>H NMR of 5a

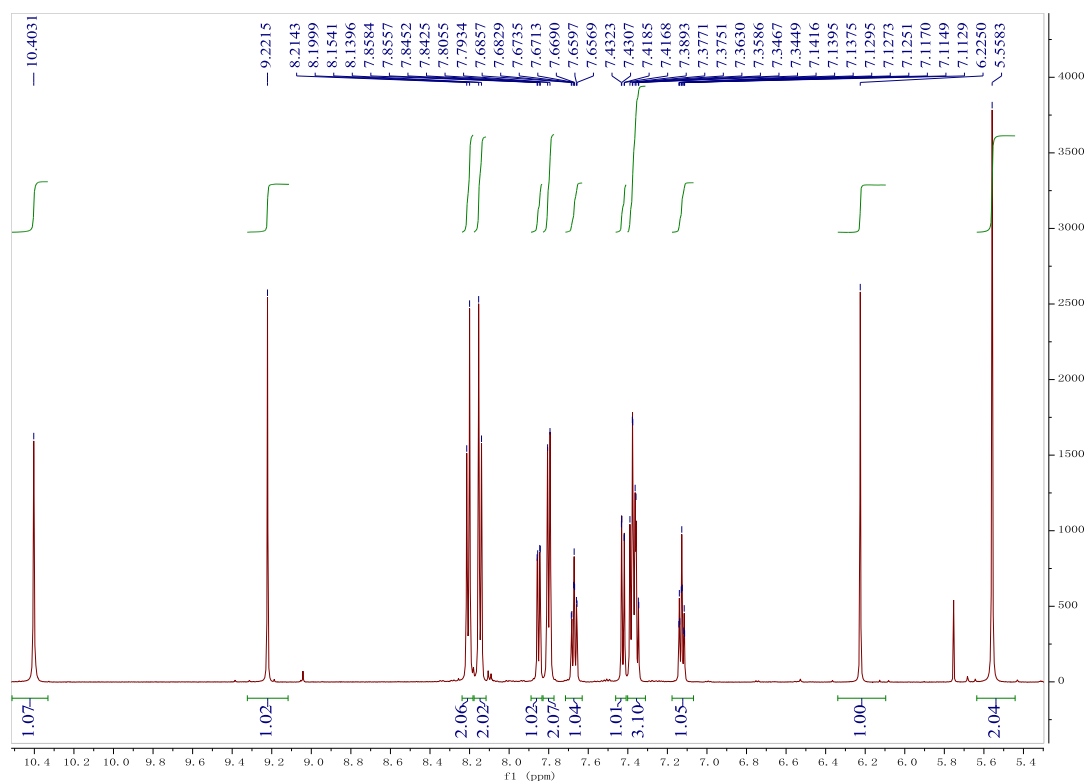

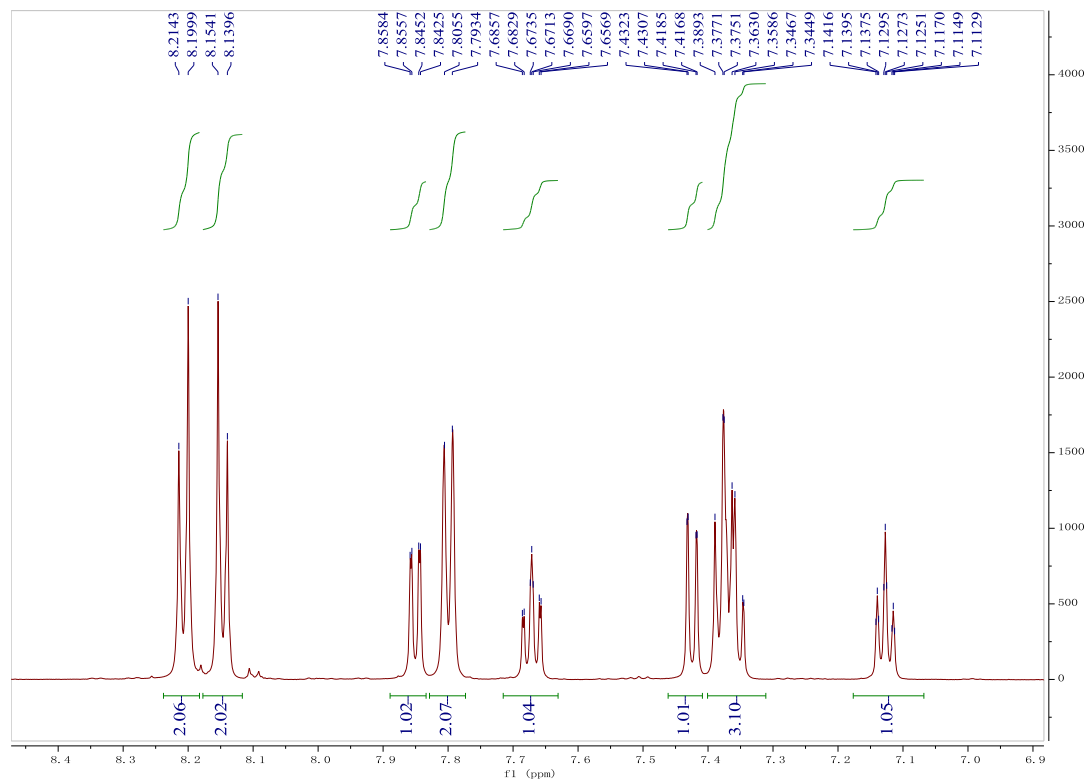

### <sup>13</sup>C NMR of 5a

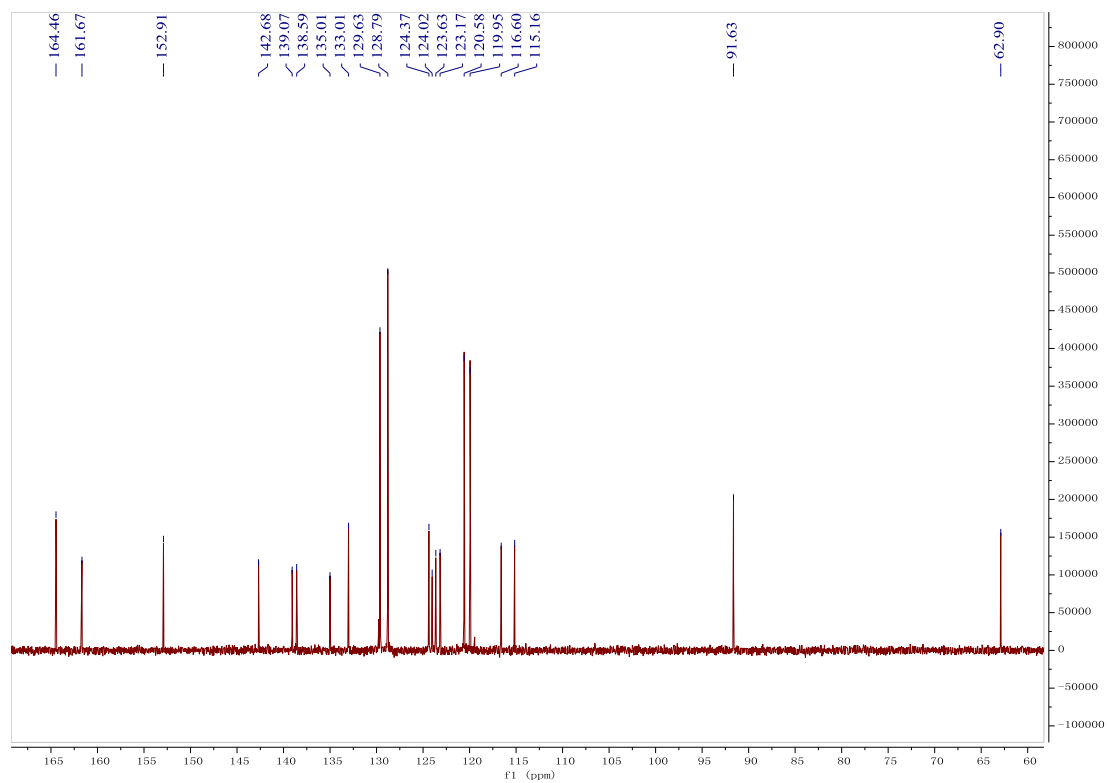

5b

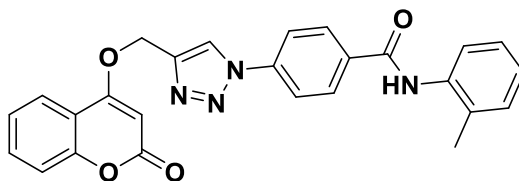

4-(4-(((2-oxo-2H-chromen-4-yl)oxy)methyl)-1H-1,2,3-triazol-1-yl)-N-(o-tolyl)benzamide

HRMS of 5b

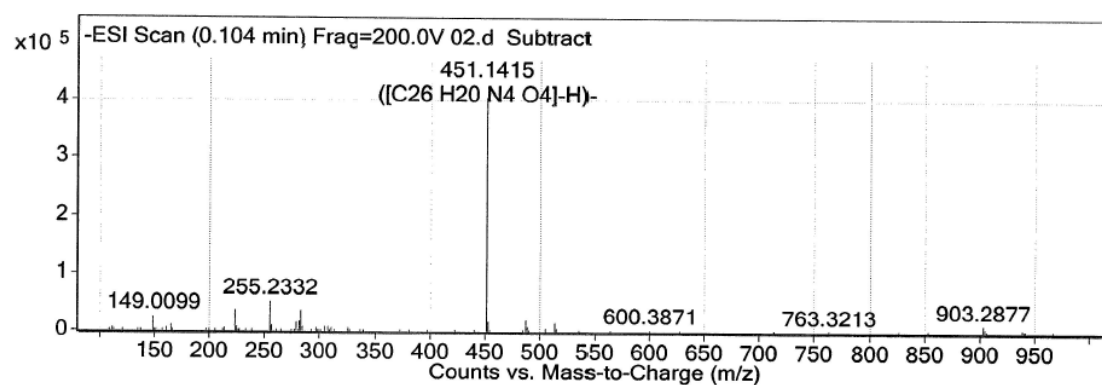

<sup>1</sup>H NMR of 5b

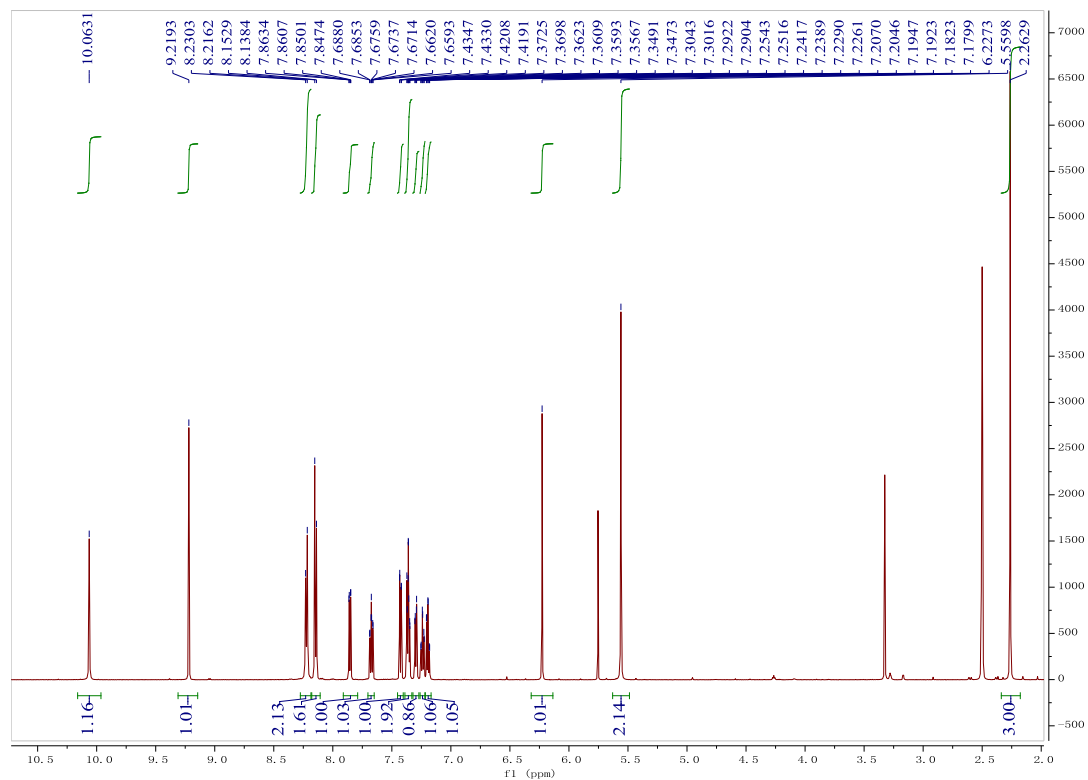

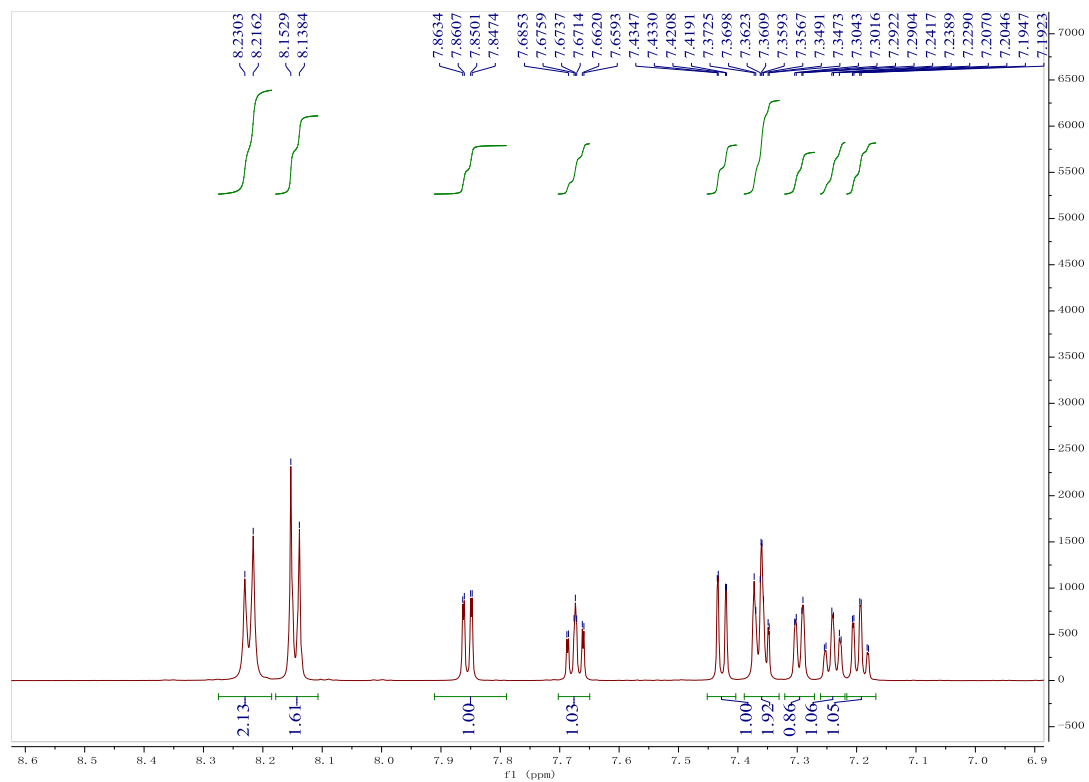

### <sup>13</sup>C NMR of 5b

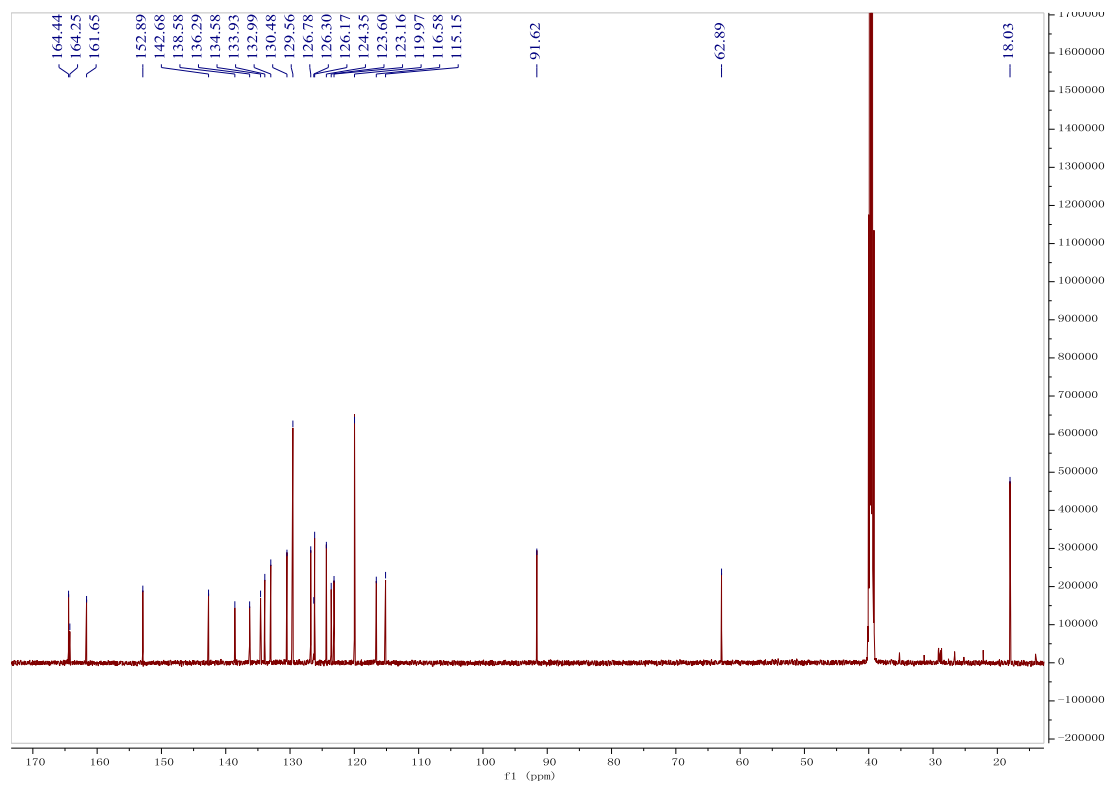

5c

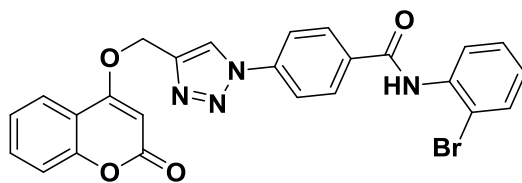

***N*-(2-bromophenyl)-4-(4-((2-oxo-2*H*-chromen-4-yl)oxy)methyl)-1*H*-1,2,3-triazol-1-ylbenzamide**

HRMS of 5c

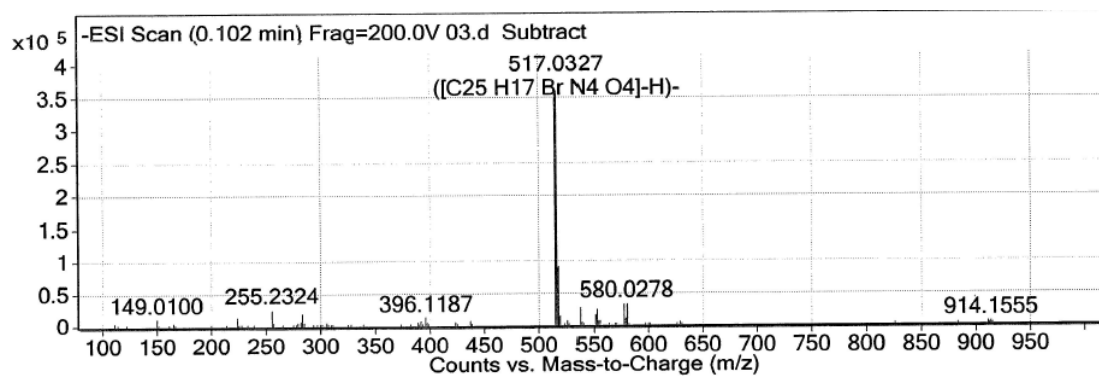

<sup>1</sup>H NMR of 5c

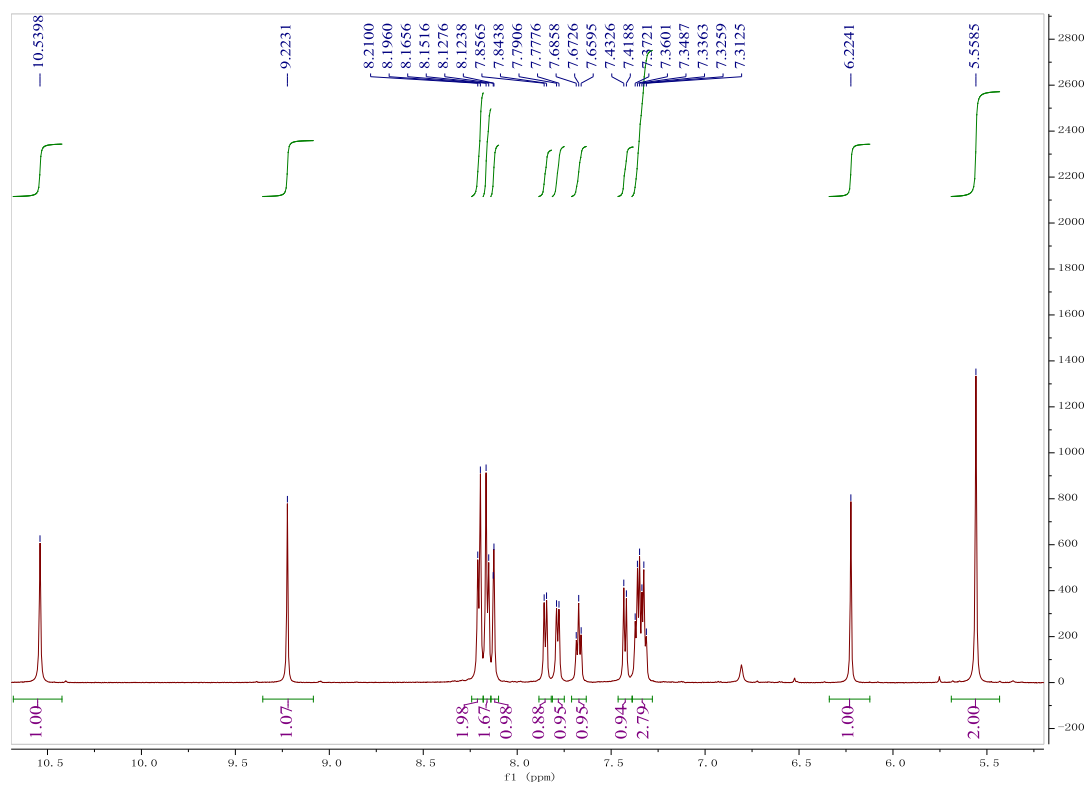

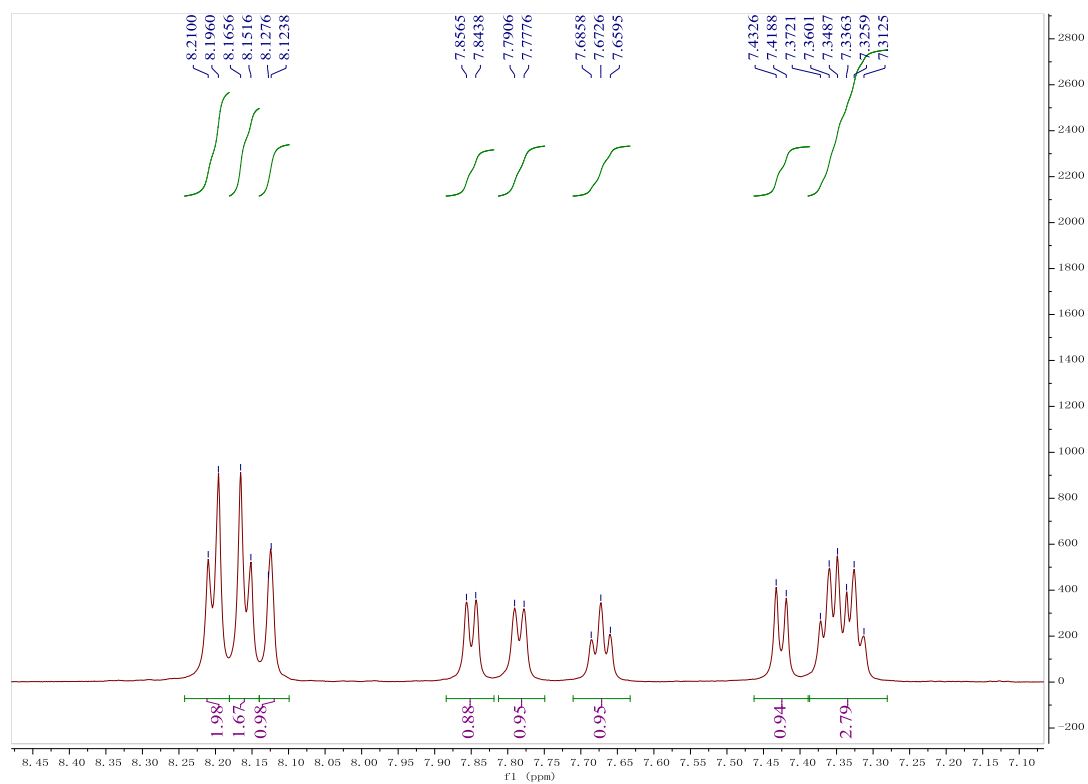

### <sup>13</sup>C NMR of 5c

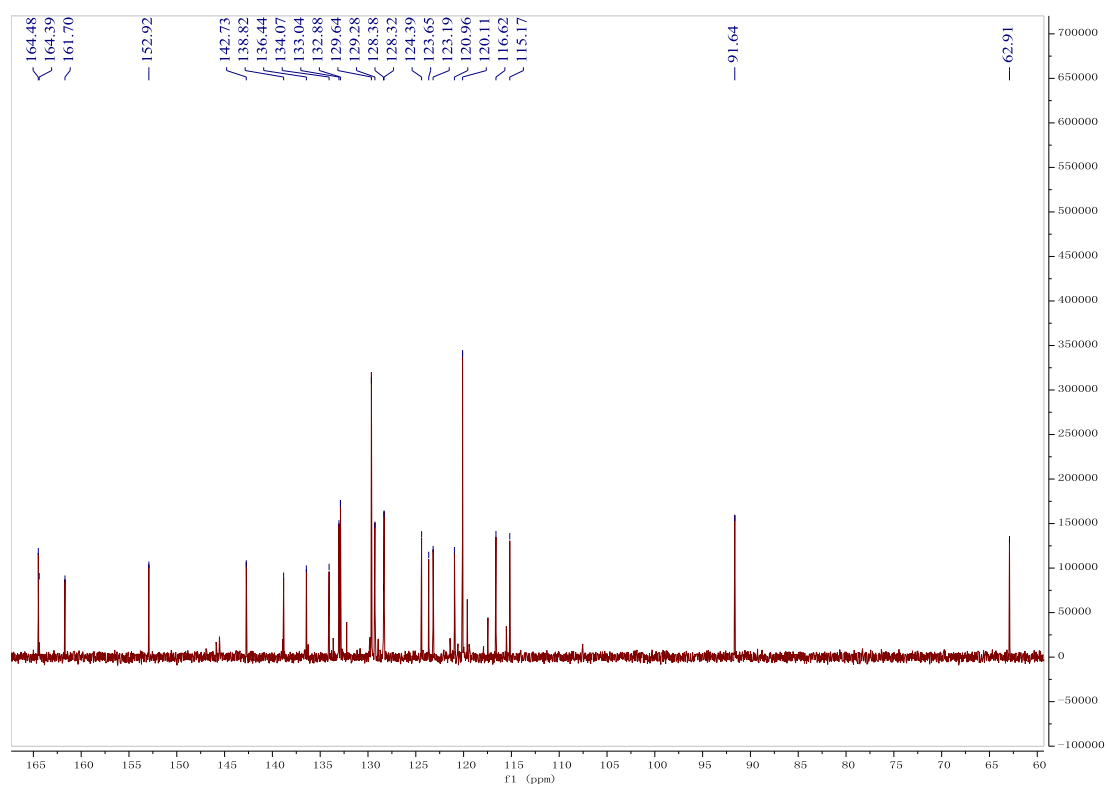

5d

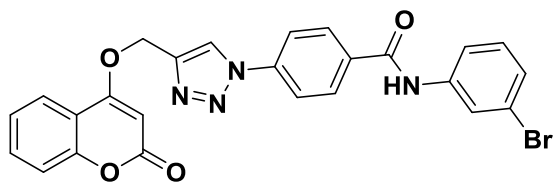

**N-(3-bromophenyl)-4-(4-((2-oxo-2H-chromen-4-yl)oxy)methyl)-1H-1,2,3-triazol-1-yl)benzamide**

HRMS of 5d

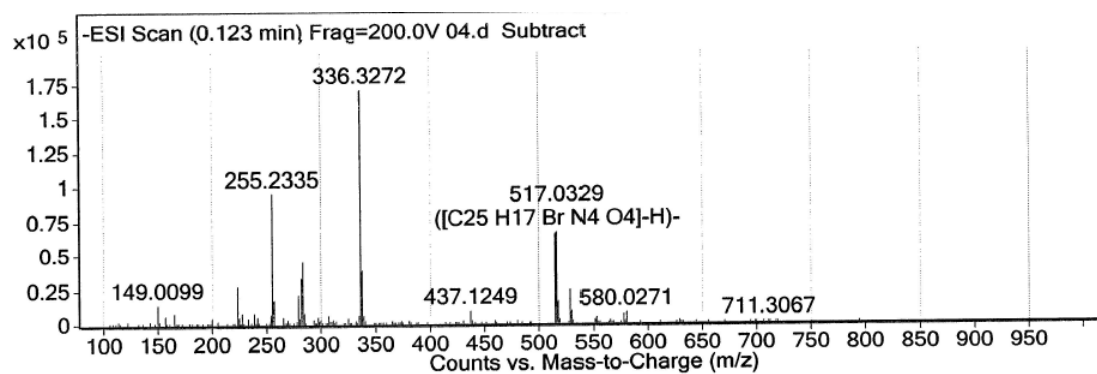

<sup>1</sup>H NMR of 5d

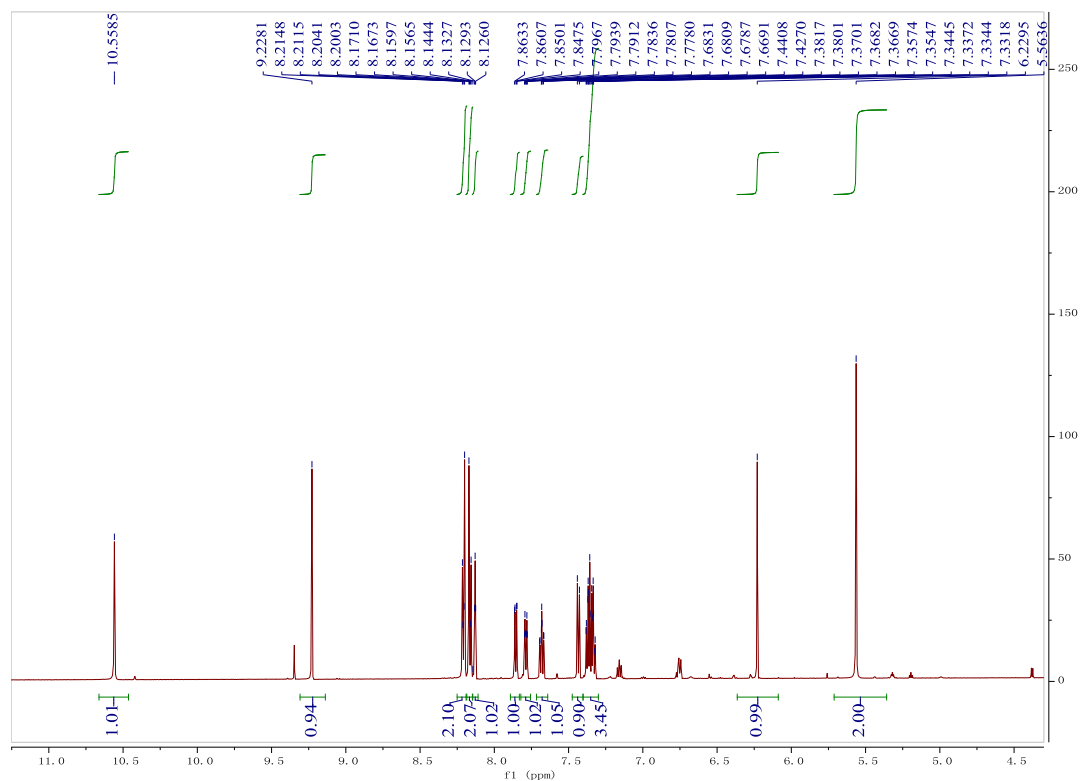

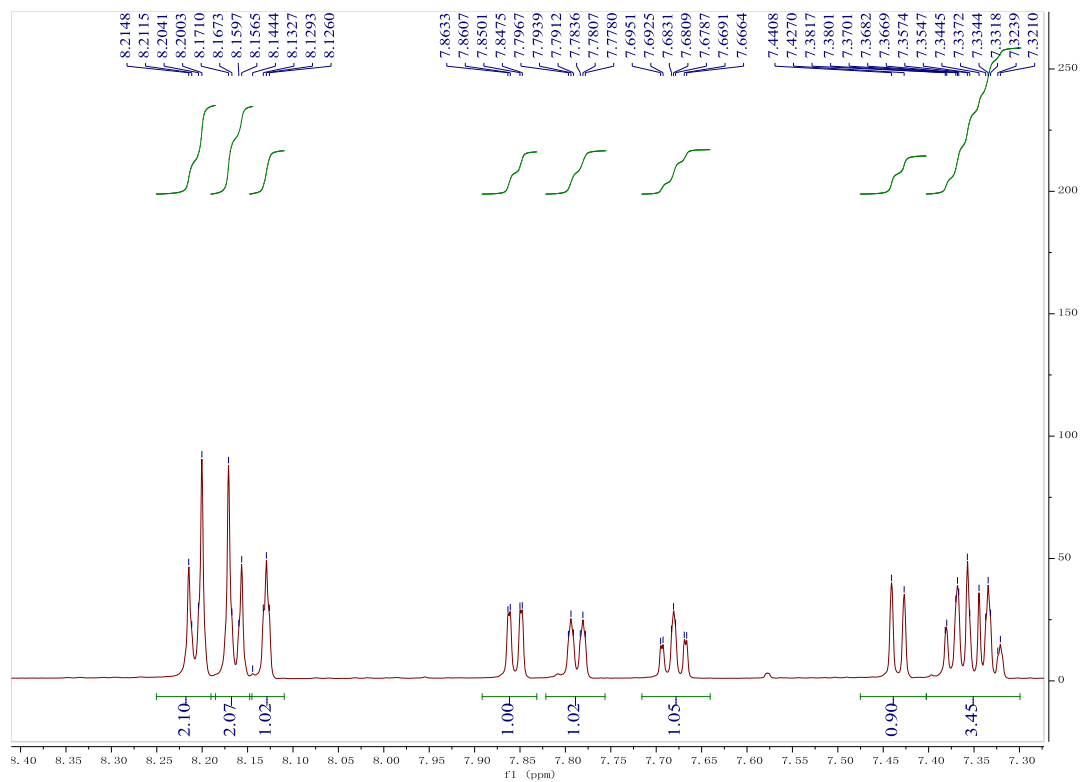

### <sup>13</sup>C NMR of 5d

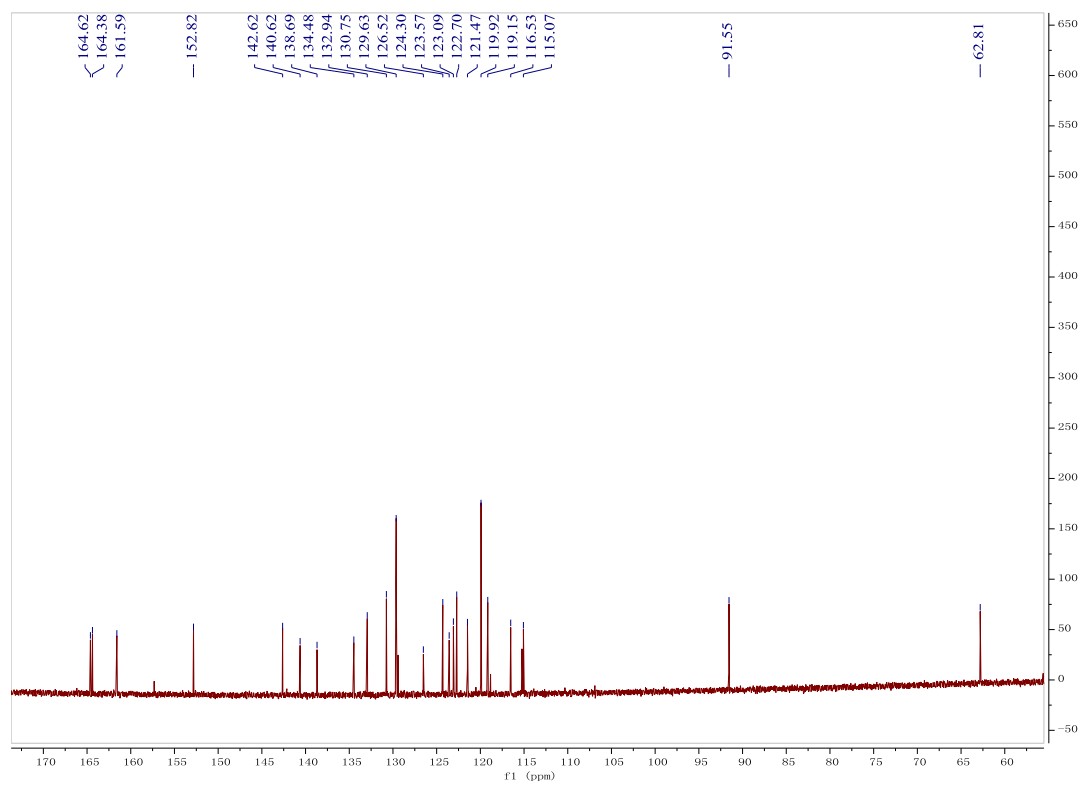



5e

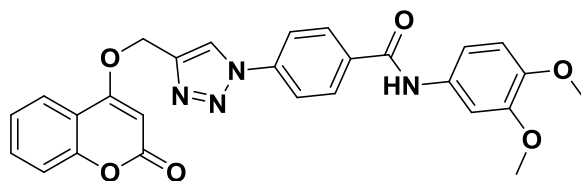

**N-(3,4-dimethoxyphenyl)-4-(4-(((2-oxo-2H-chromen-4-yl)oxy)methyl)-1H-1,2,3-triazol-1-yl)benzamide**

HRMS of 5e

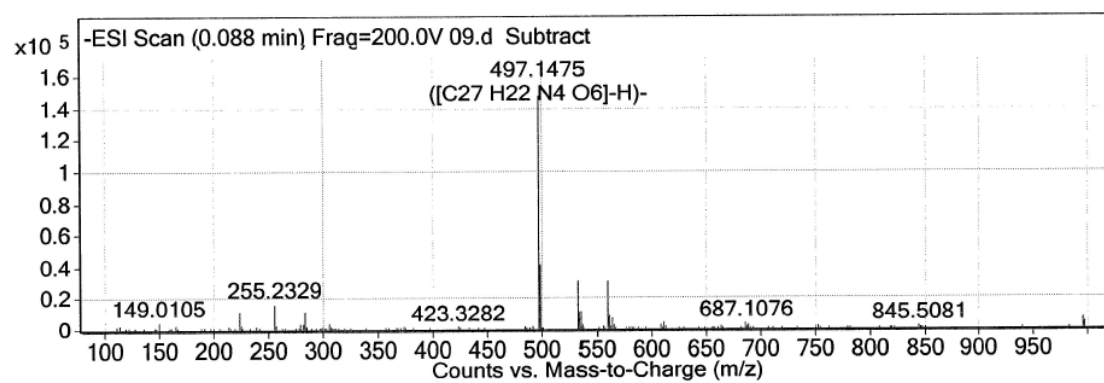

<sup>1</sup>H NMR of 5e

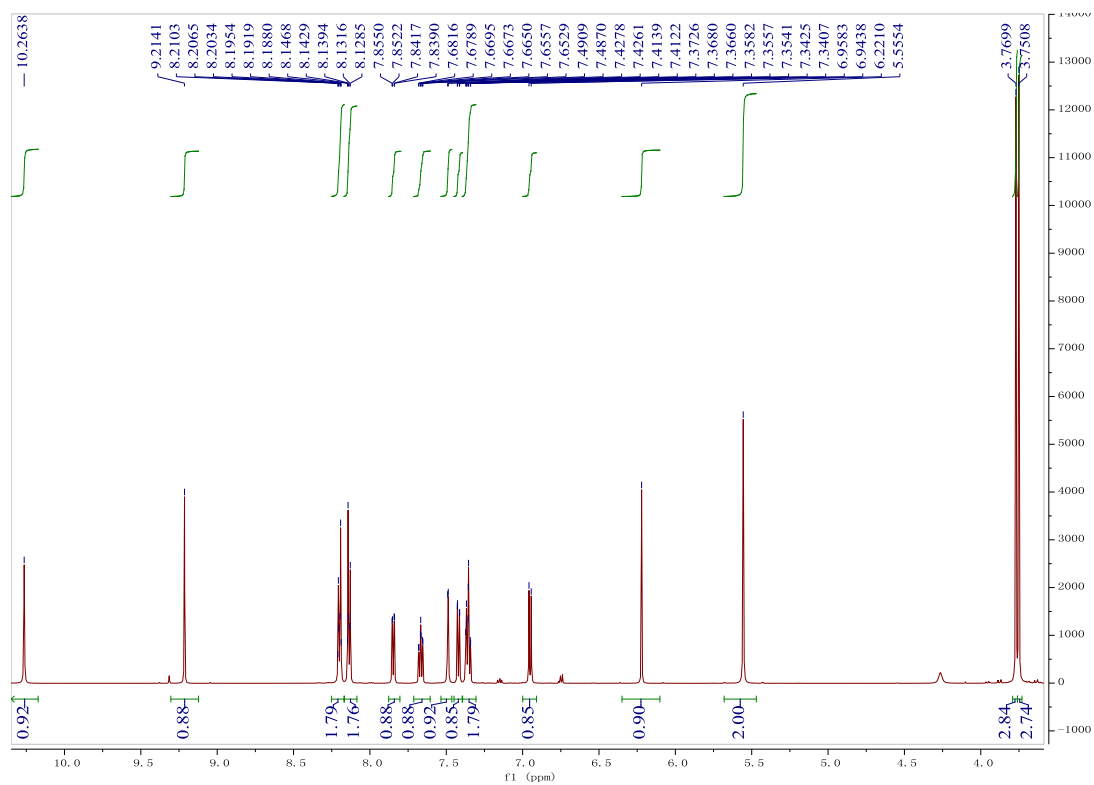

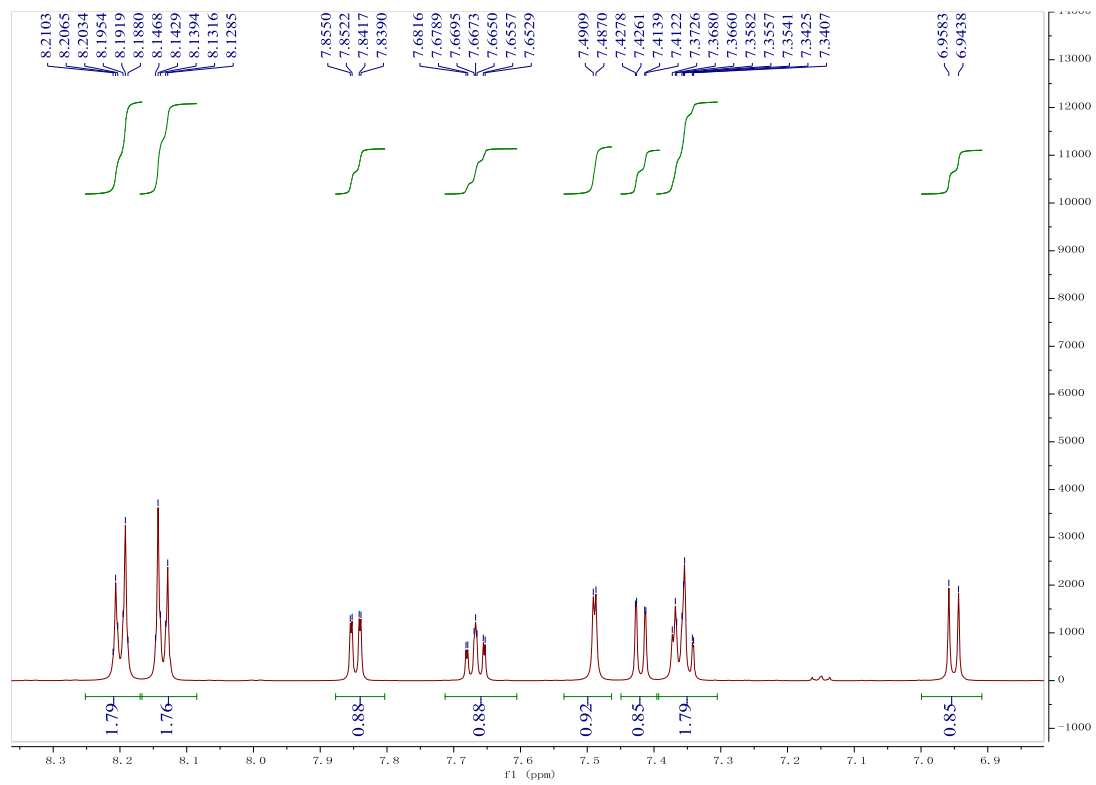

### <sup>13</sup>C NMR of 5e

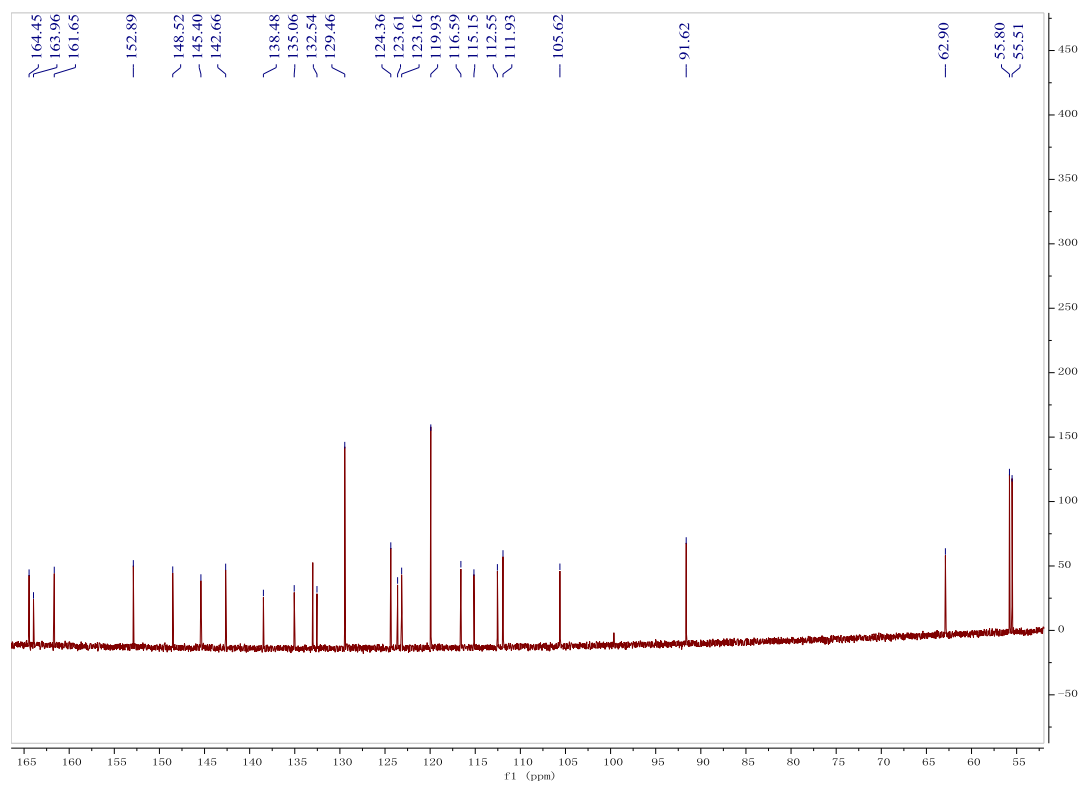

5f

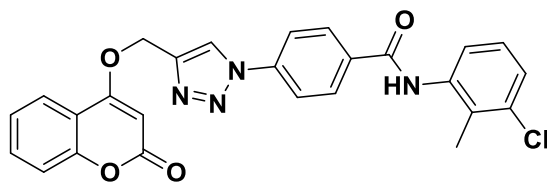

*N*-(3-chloro-2-methylphenyl)-4-(((2-oxo-2*H*-chromen-4-yl)oxy)methyl)-1*H*-1,2,3-triazol-1-ylbenzamide

HRMS of 5f

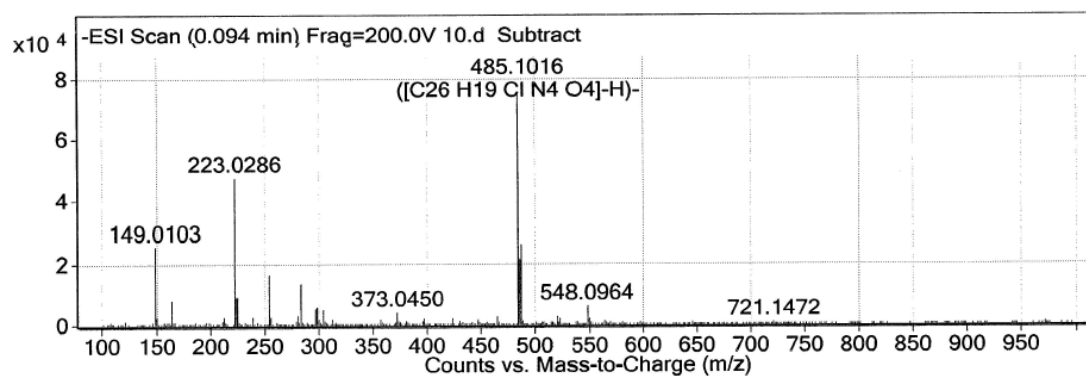

<sup>1</sup>H NMR of 5f

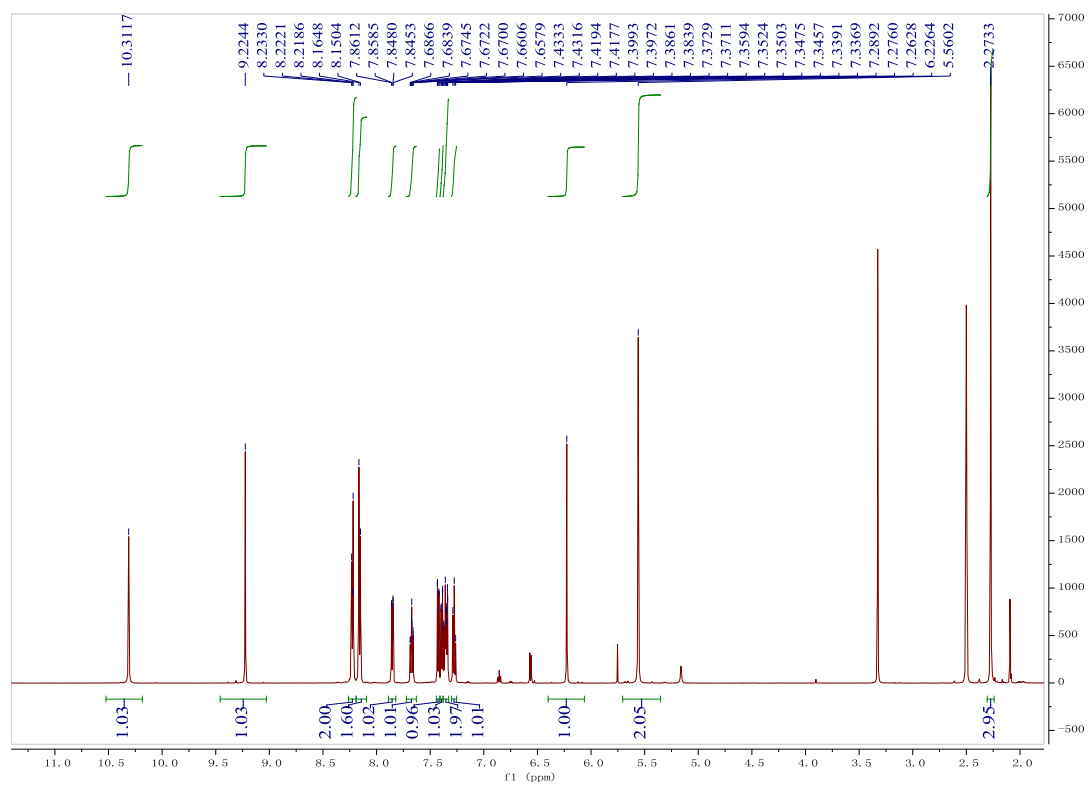

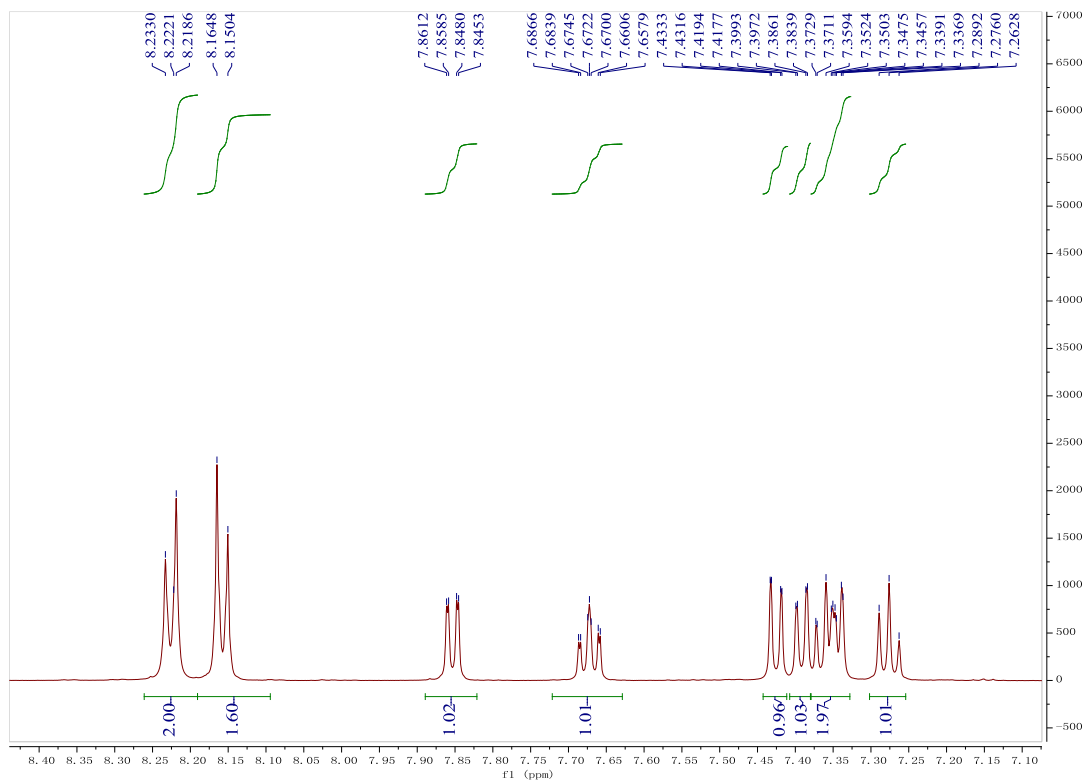

### <sup>13</sup>C NMR of 5f

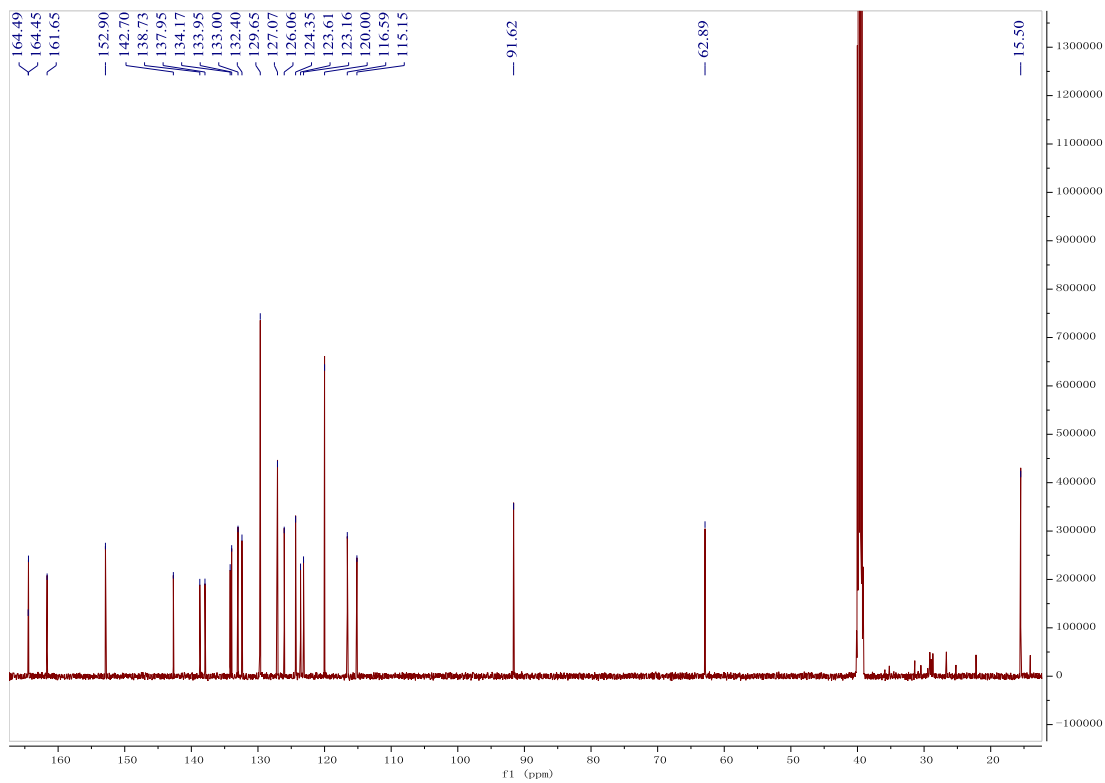

5g

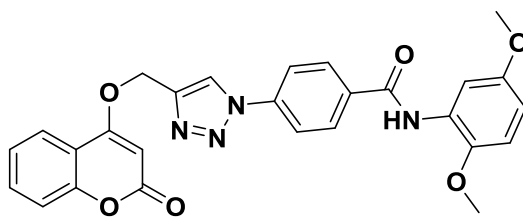

**N-(2,5-dimethoxyphenyl)-4-(4-(((2-oxo-2H-chromen-4-yl)oxy)methyl)-1H-1,2,3-triazol-1-yl)benzamide**

HRMS of 5g

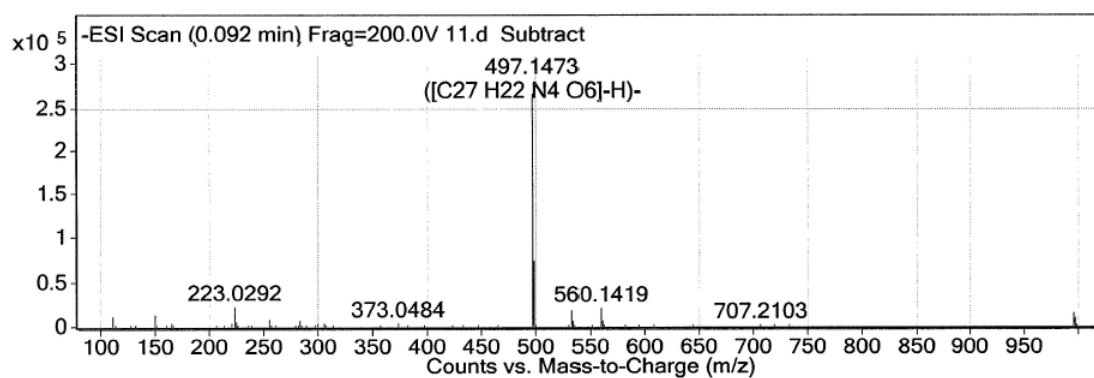

<sup>1</sup>H NMR of 5g

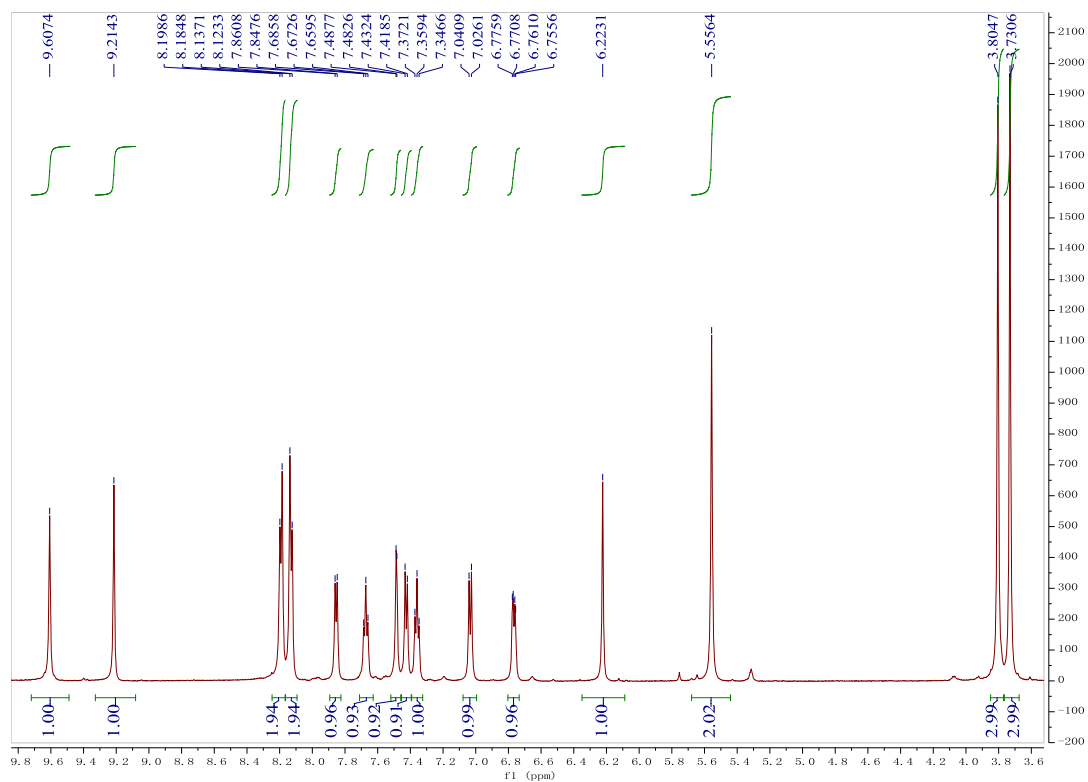

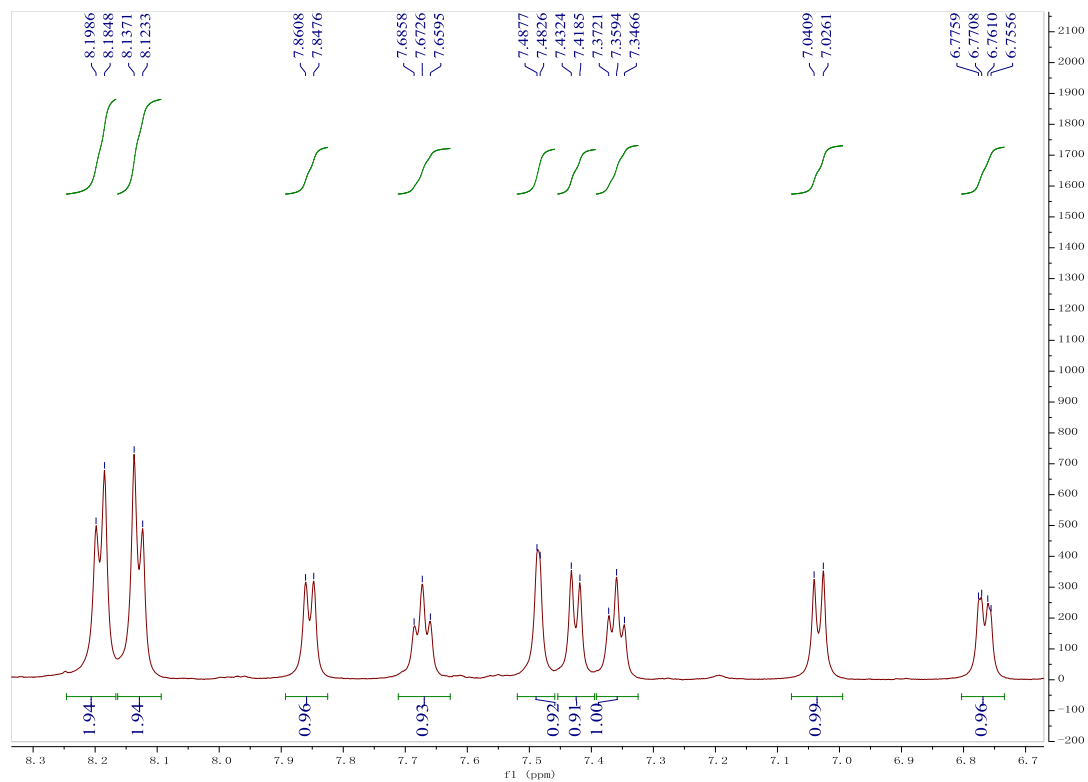

### <sup>13</sup>C NMR of 5g

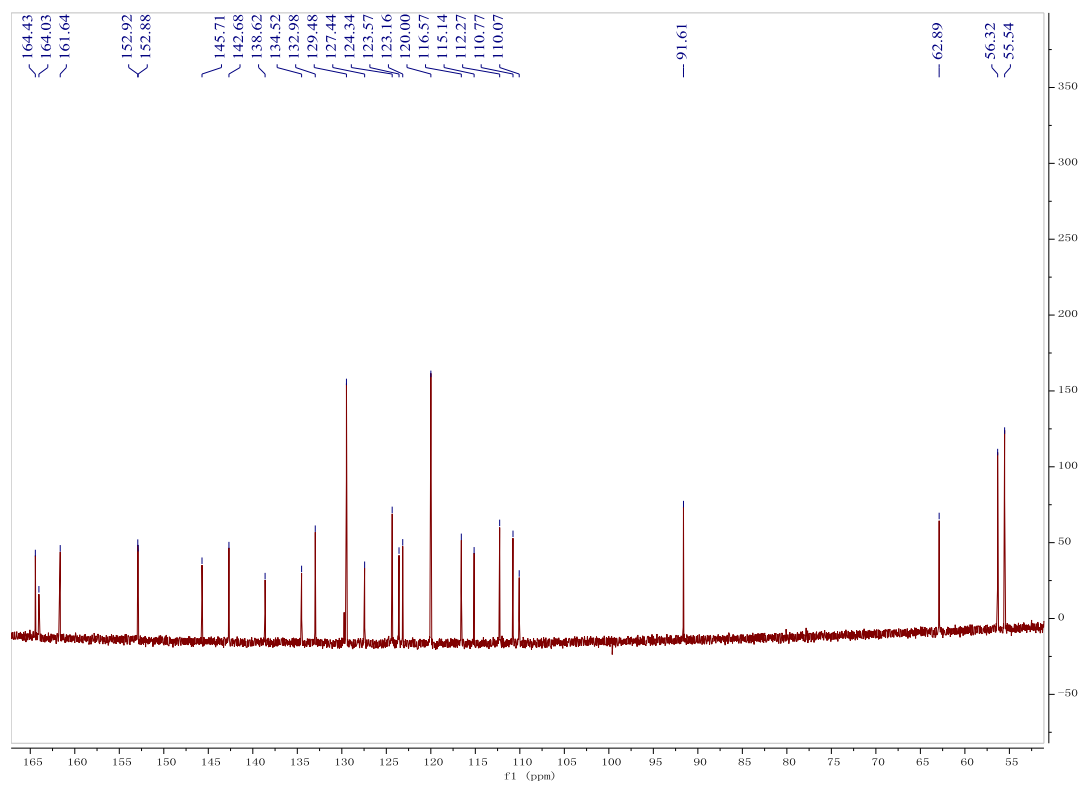

5h

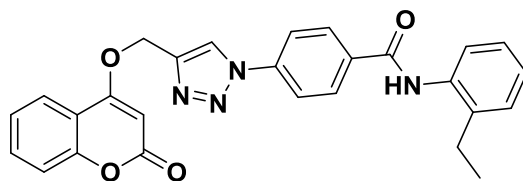

***N***-(2-ethylphenyl)-4-(4-(((2-oxo-2*H*-chromen-4-yl)oxy)methyl)-1*H*-1,2,3-triazol-1-yl)benzamide

HRMS of 5h

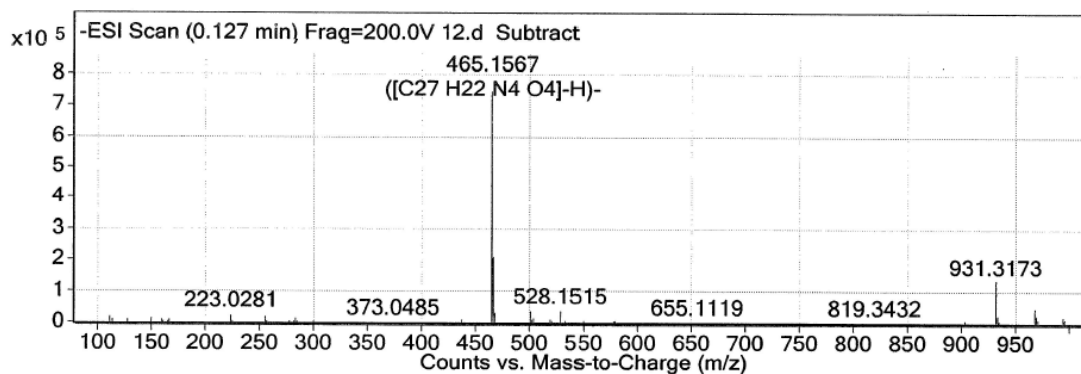

<sup>1</sup>H NMR of 5h

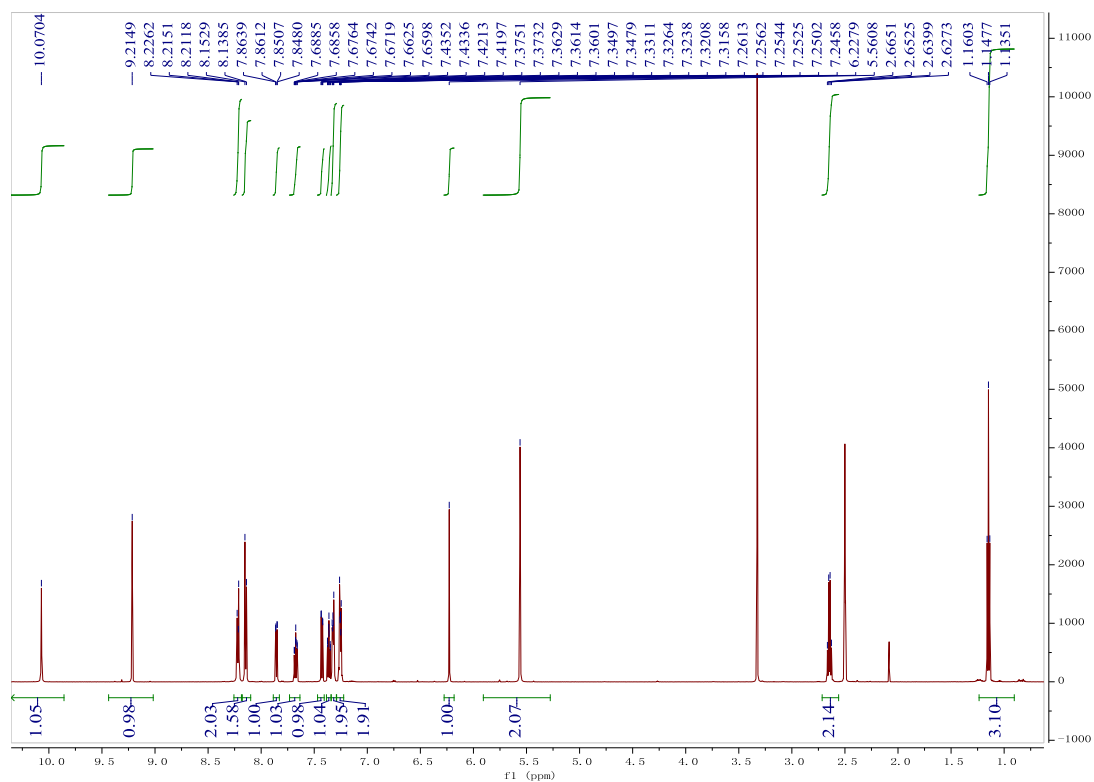

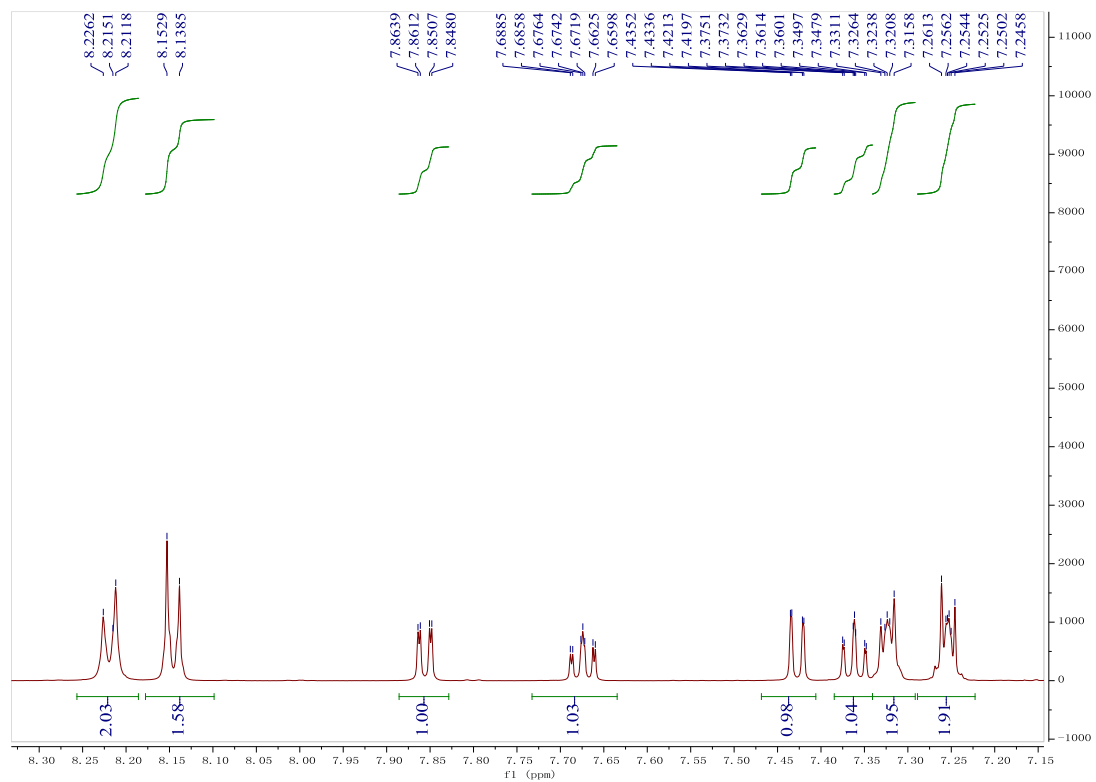

### <sup>13</sup>C NMR of 5h

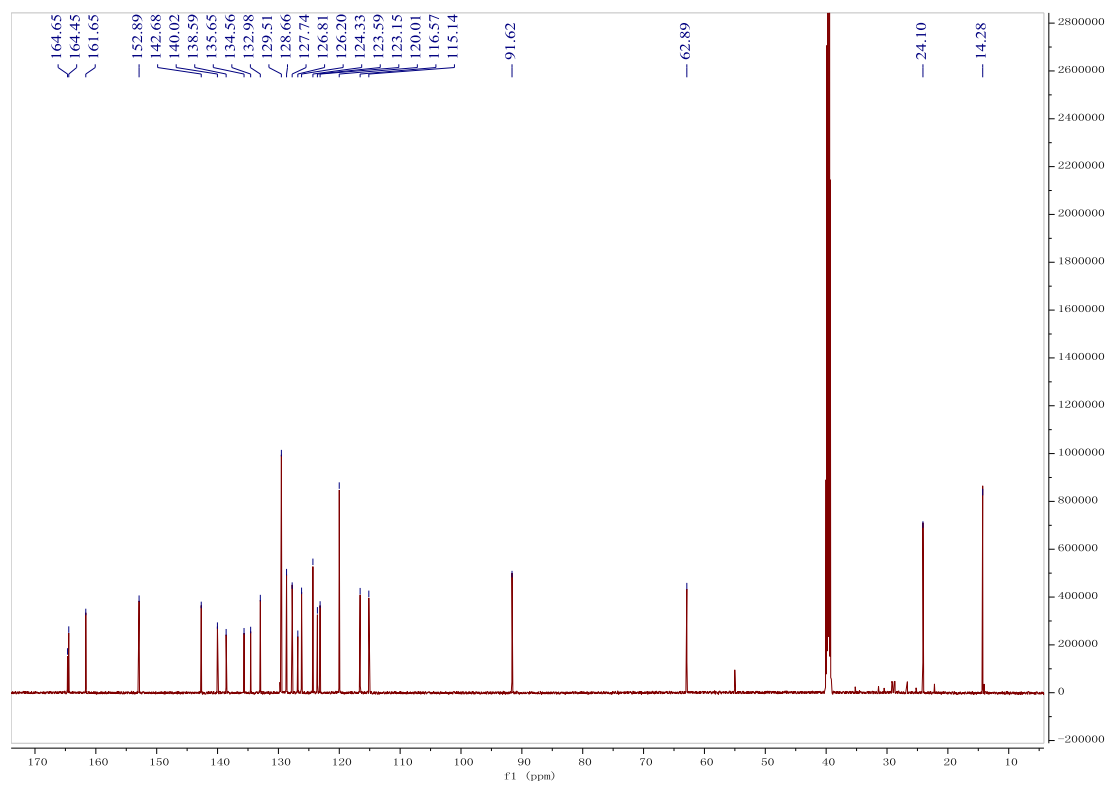



5i

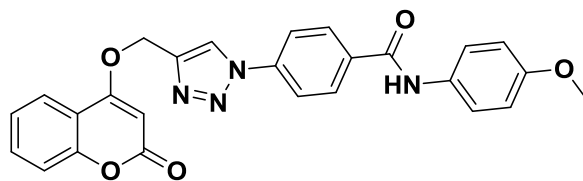

**N-(4-methoxyphenyl)-4-(4-(((2-oxo-2H-chromen-4-yl)oxy)methyl)-1H-1,2,3-triazol-1-yl)benzamide**

**HRMS of 5i**

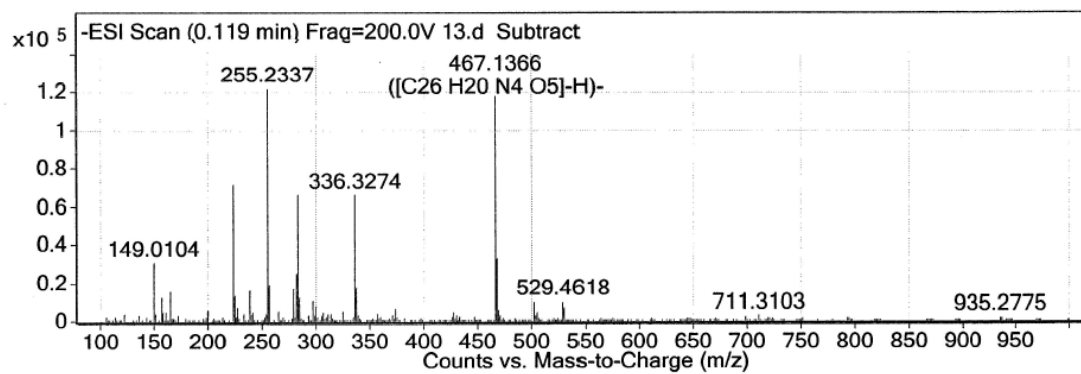

**<sup>1</sup>H NMR of 5i**

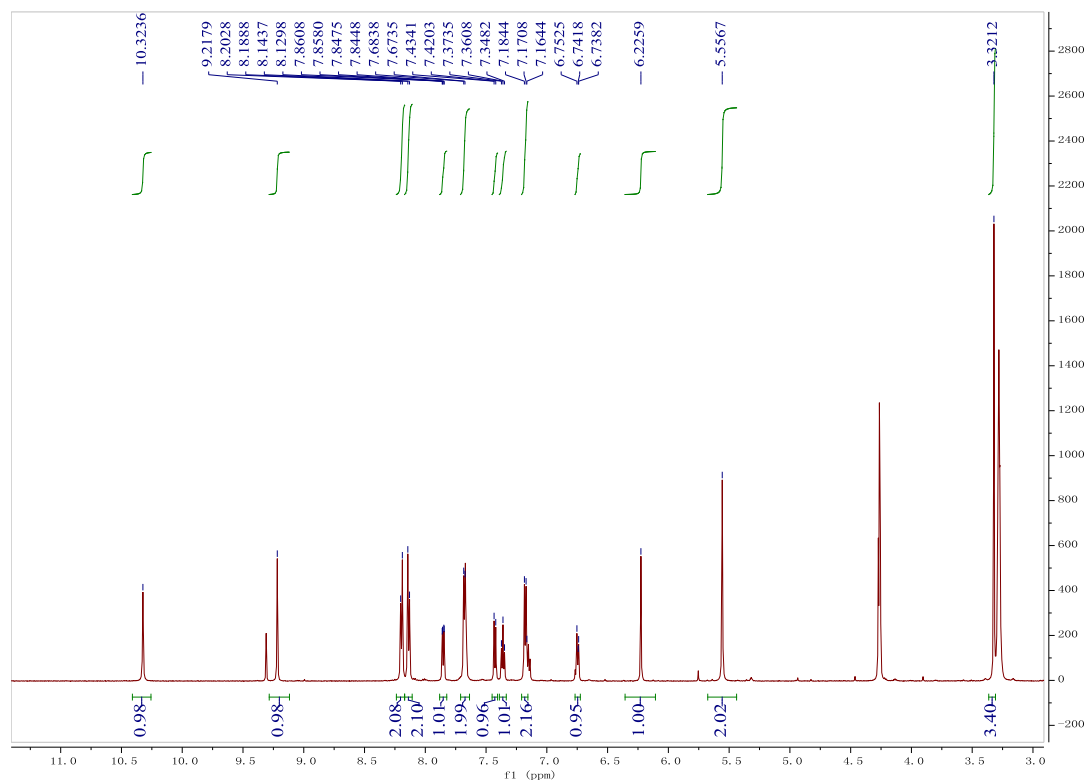

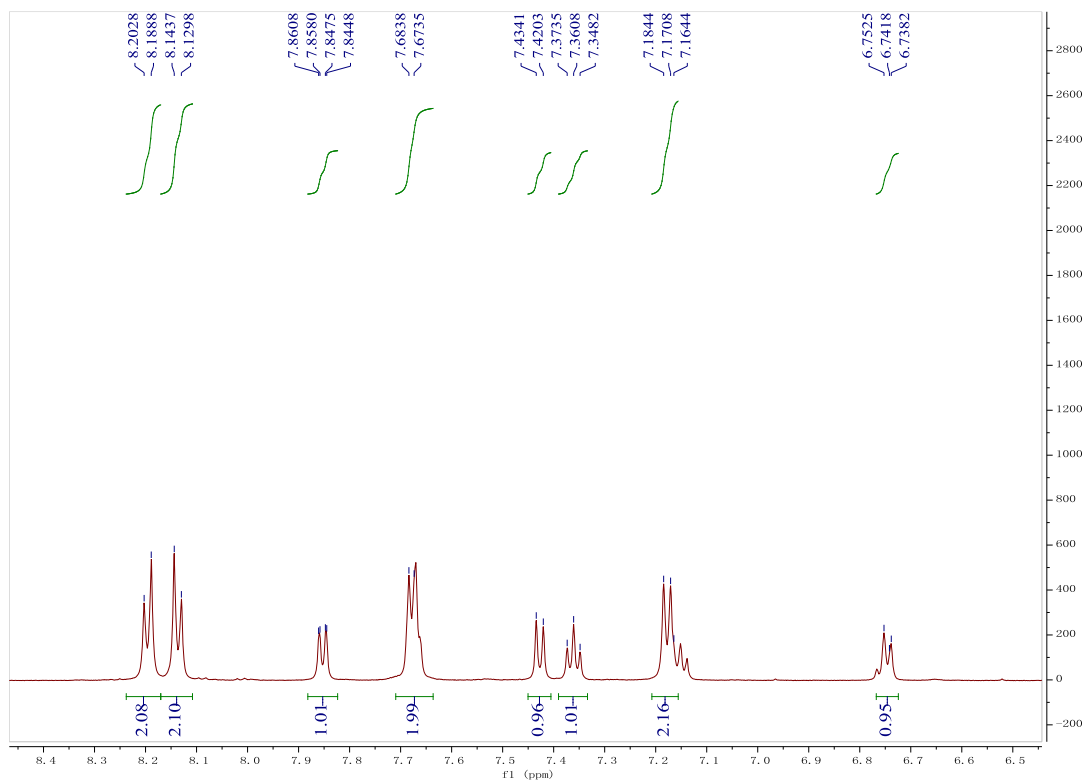

### <sup>13</sup>C NMR of 5i

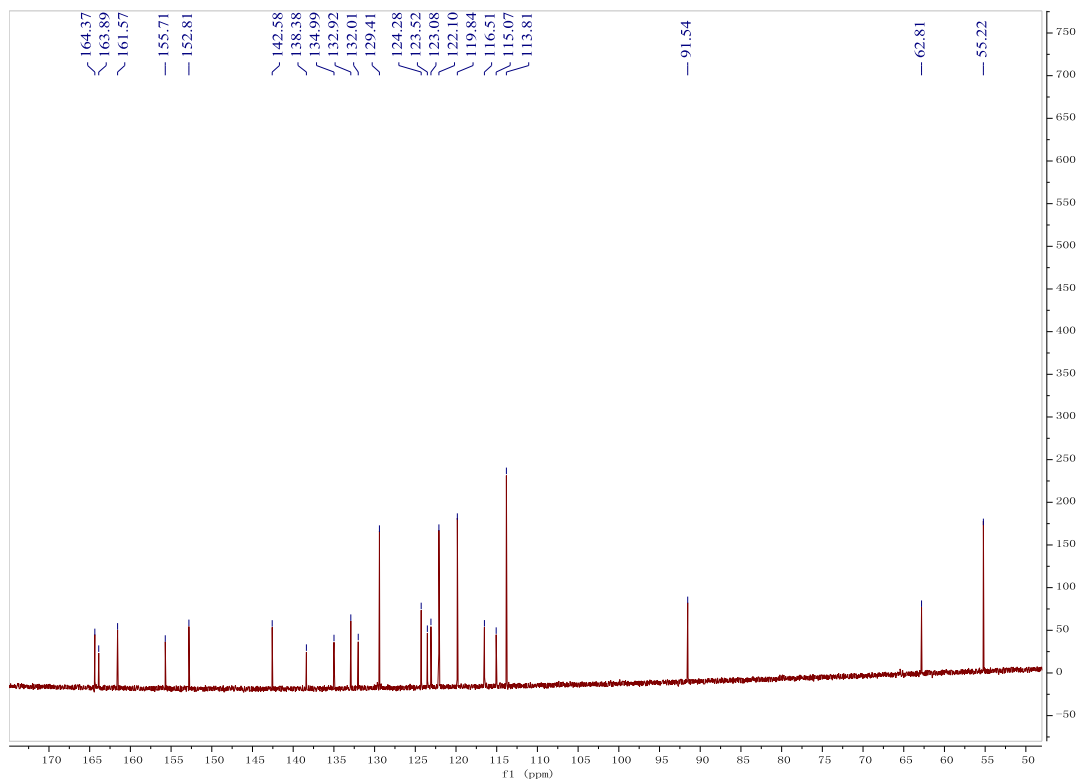

5j

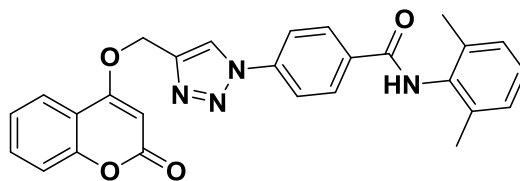

***N*-(2,6-dimethylphenyl)-4-(4-(((2-oxo-2*H*-chromen-4-yl)oxy)methyl)-1*H*-1,2,3-triazol-1-yl)benzamide**

HRMS of 5j

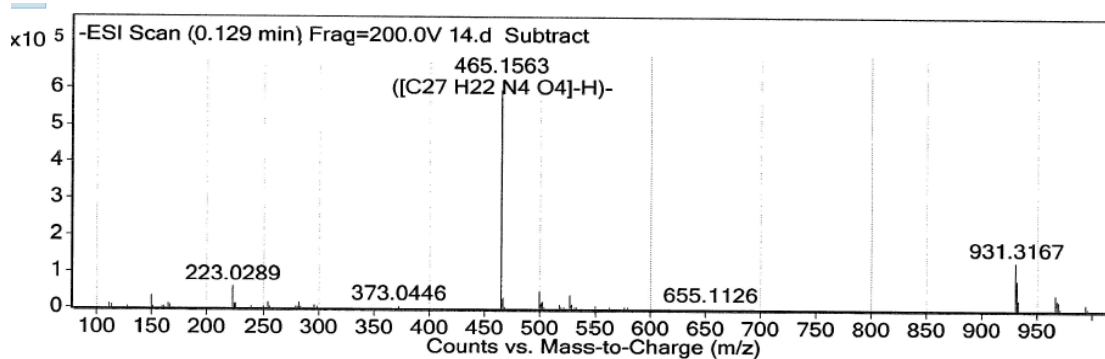

<sup>1</sup>H NMR of 5j

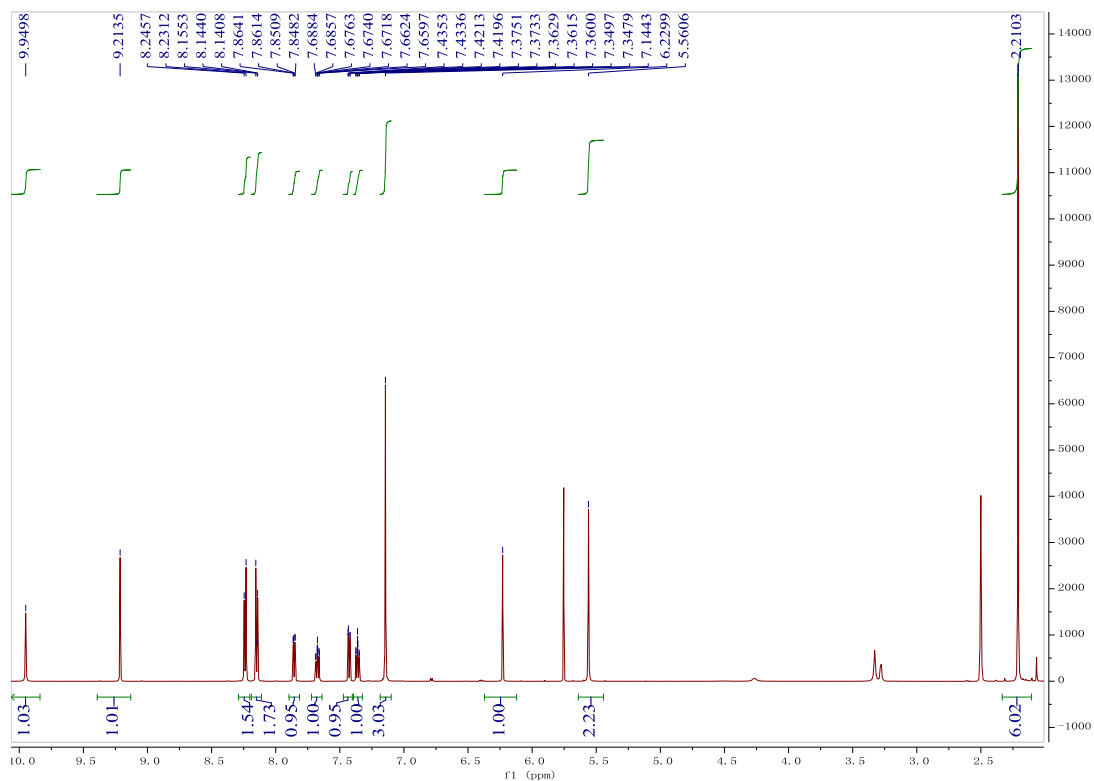

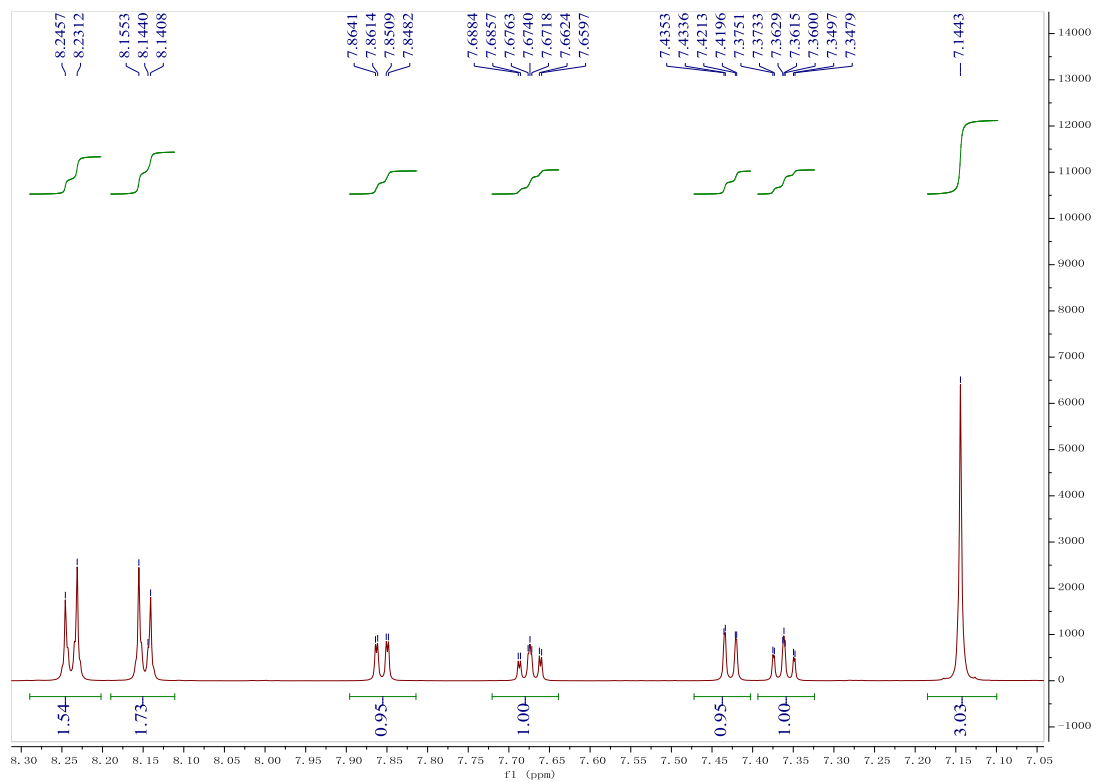

### <sup>13</sup>C NMR of 5j

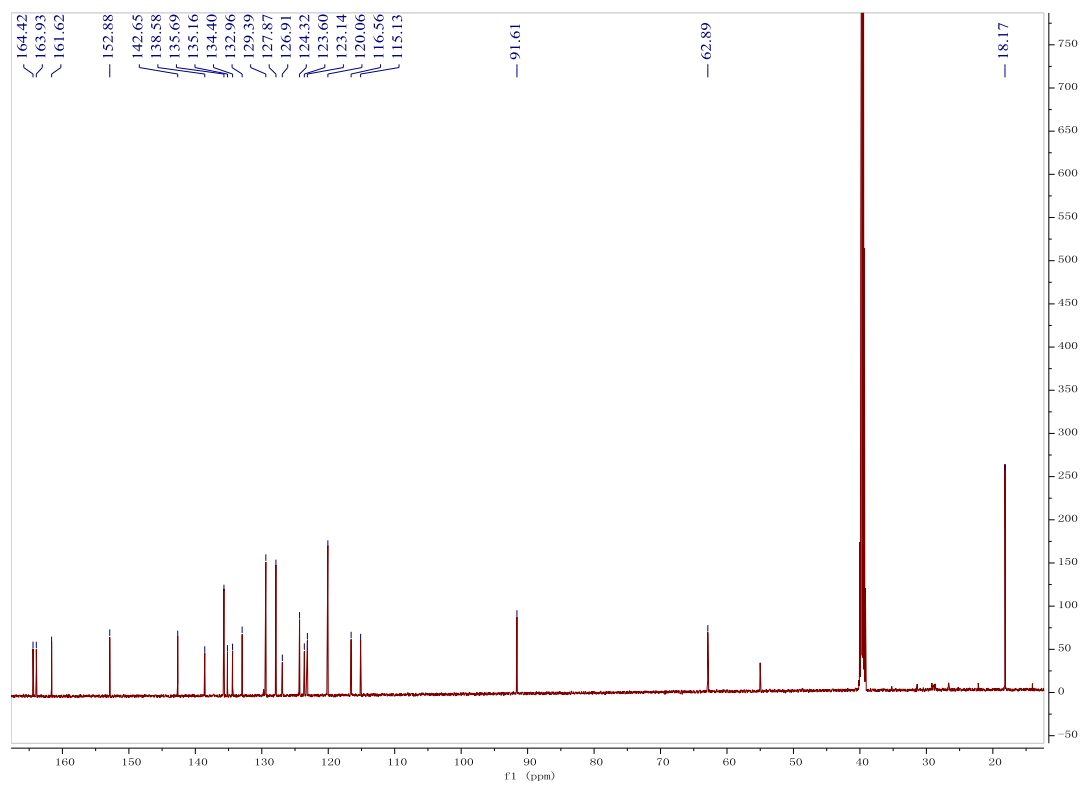

5k

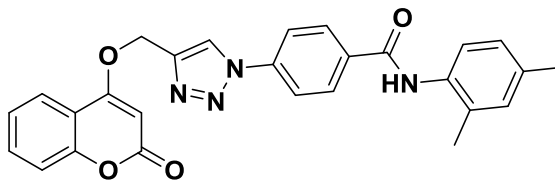

***N*-(2,4-dimethylphenyl)-4-(4-(((2-oxo-2*H*-chromen-4-yl)oxy)methyl)-1*H*-1,2,3-triazol-1-yl)benzamide**

HRMS of 5k

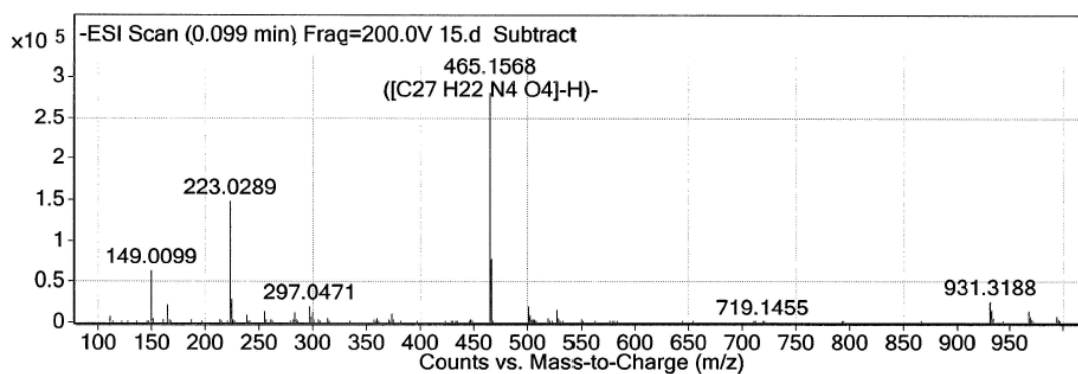

<sup>1</sup>H NMR of 5k

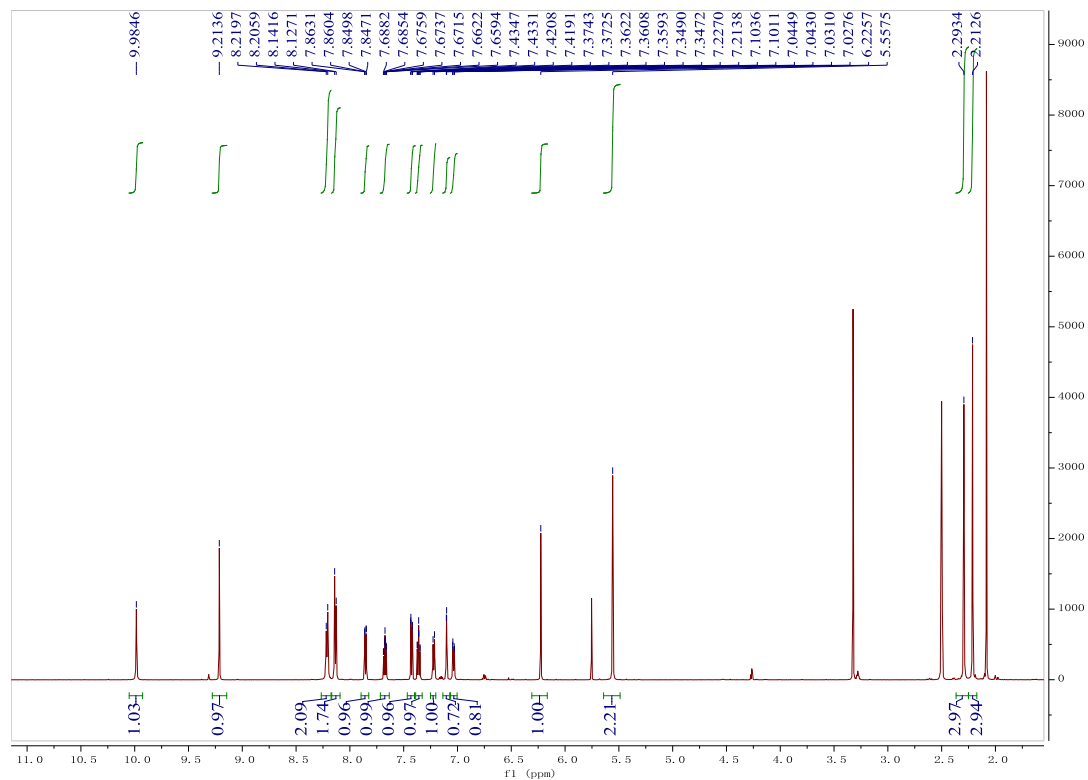

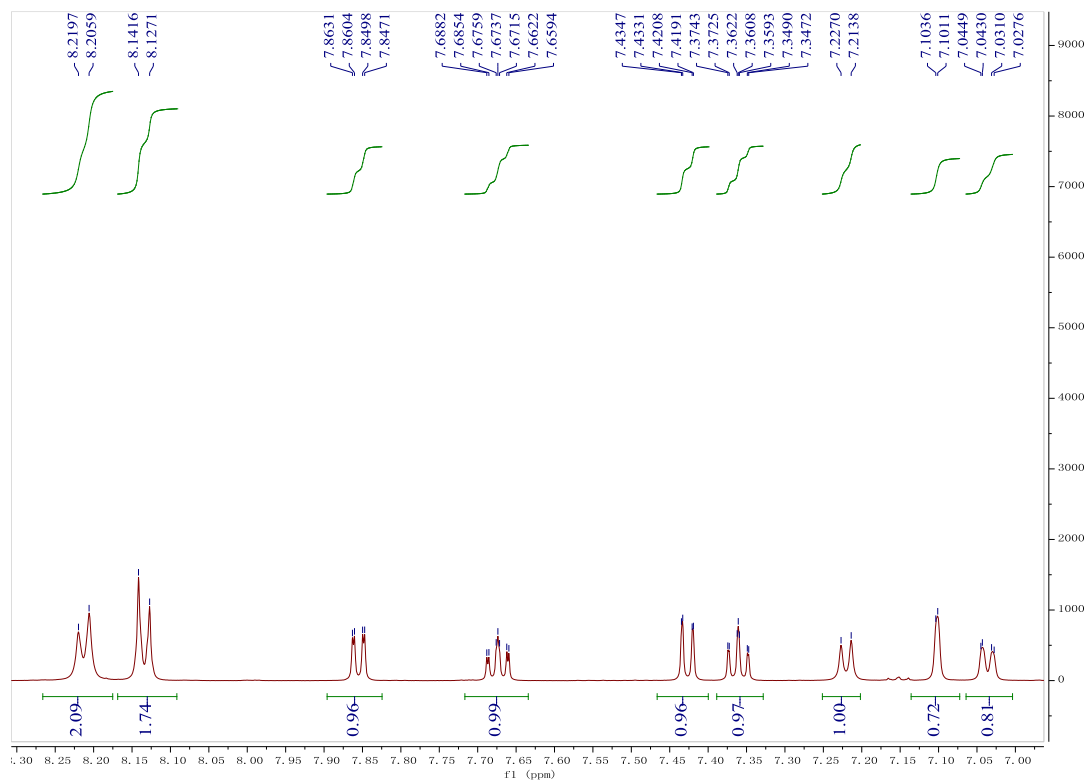

### <sup>13</sup>C NMR of 5k

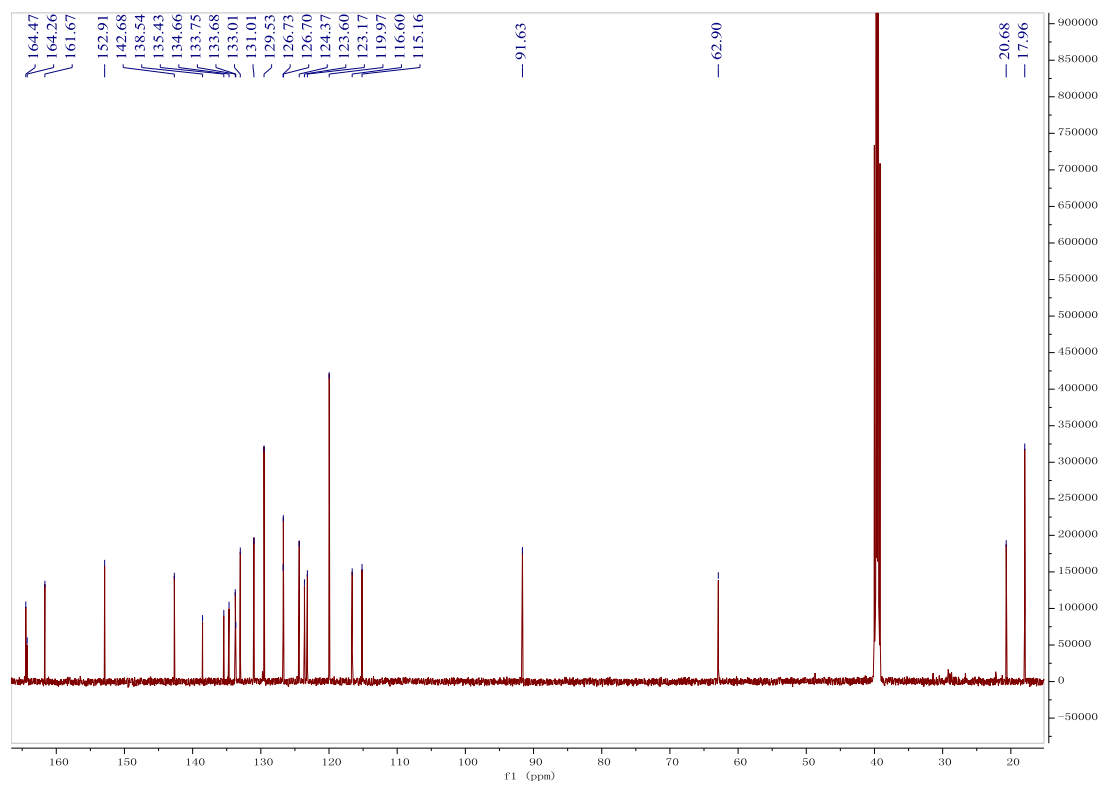

51

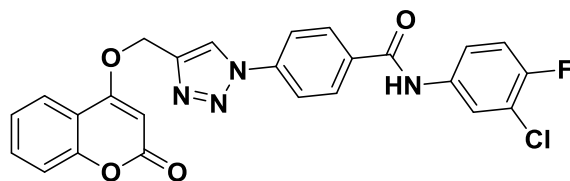

***N*-(3-chloro-4-fluorophenyl)-4-(((2-oxo-2*H*-chromen-4-yl)oxy)methyl)-1*H*-1,2,3-triazol-1-ylbenzamide**

### HRMS of 51

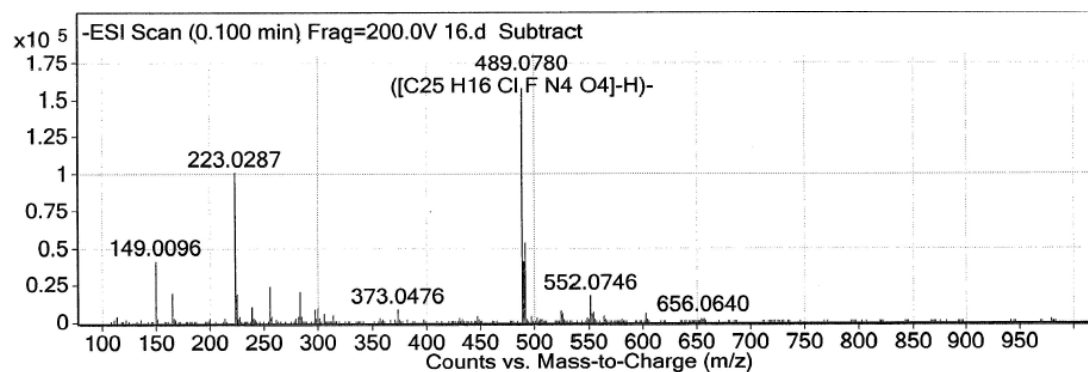

### <sup>1</sup>H NMR of 51

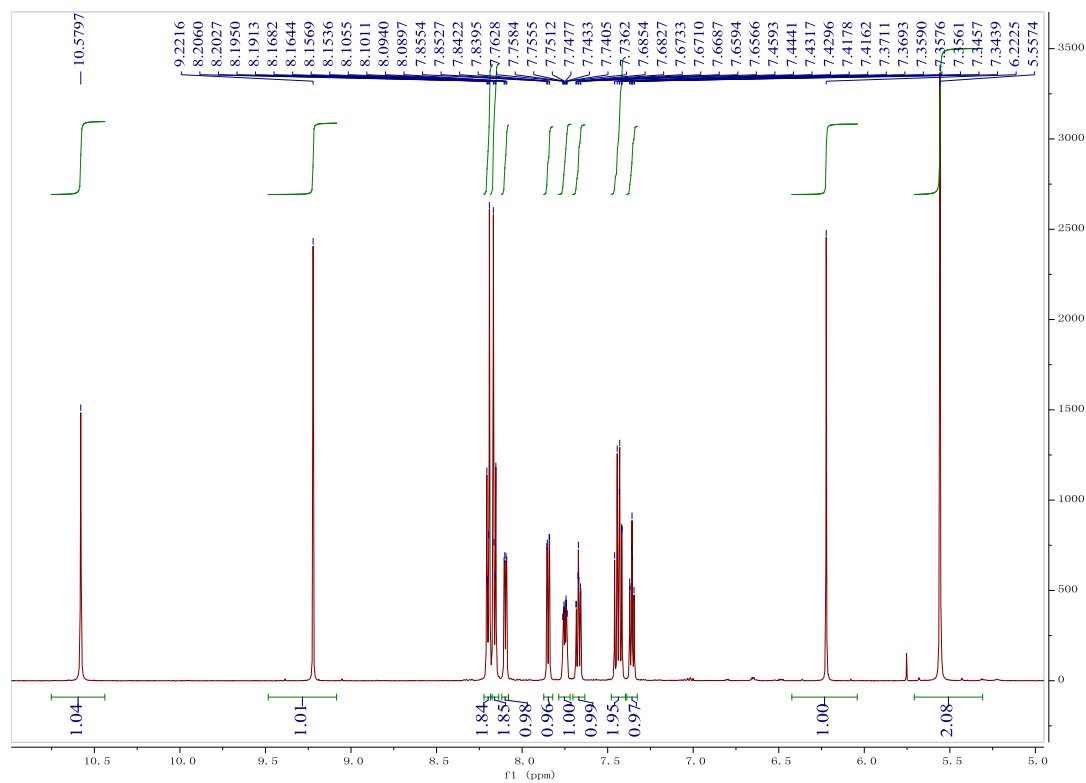

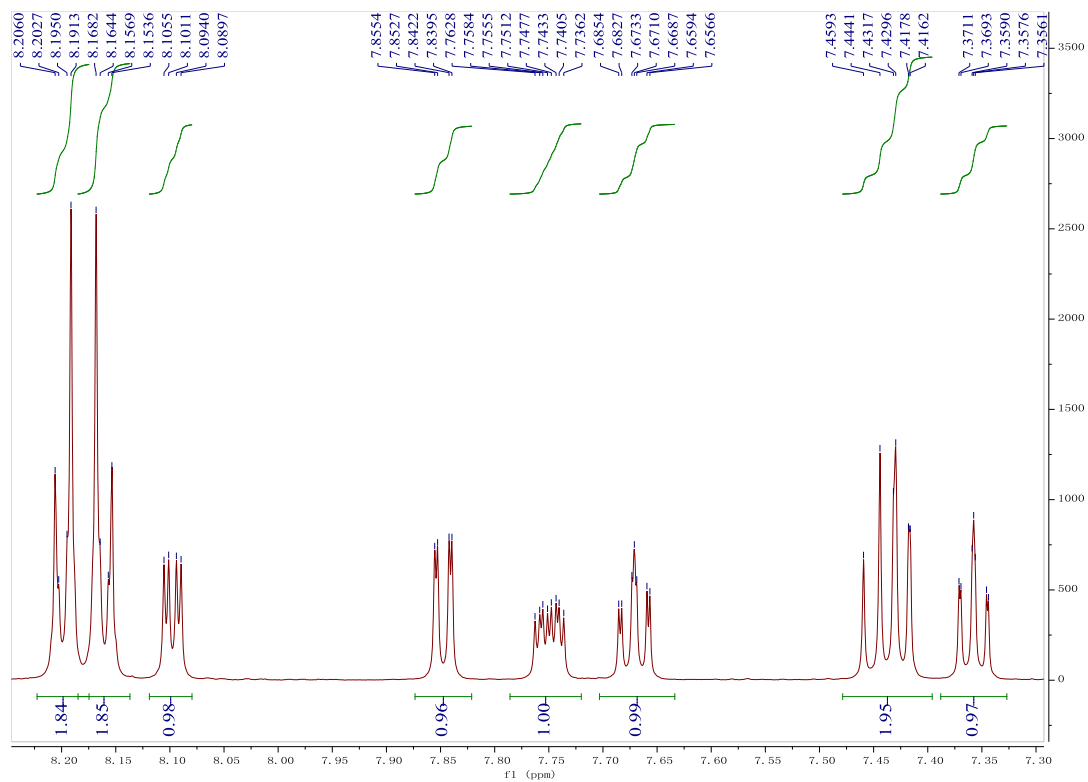

### $^{13}\text{C}$ NMR of 51

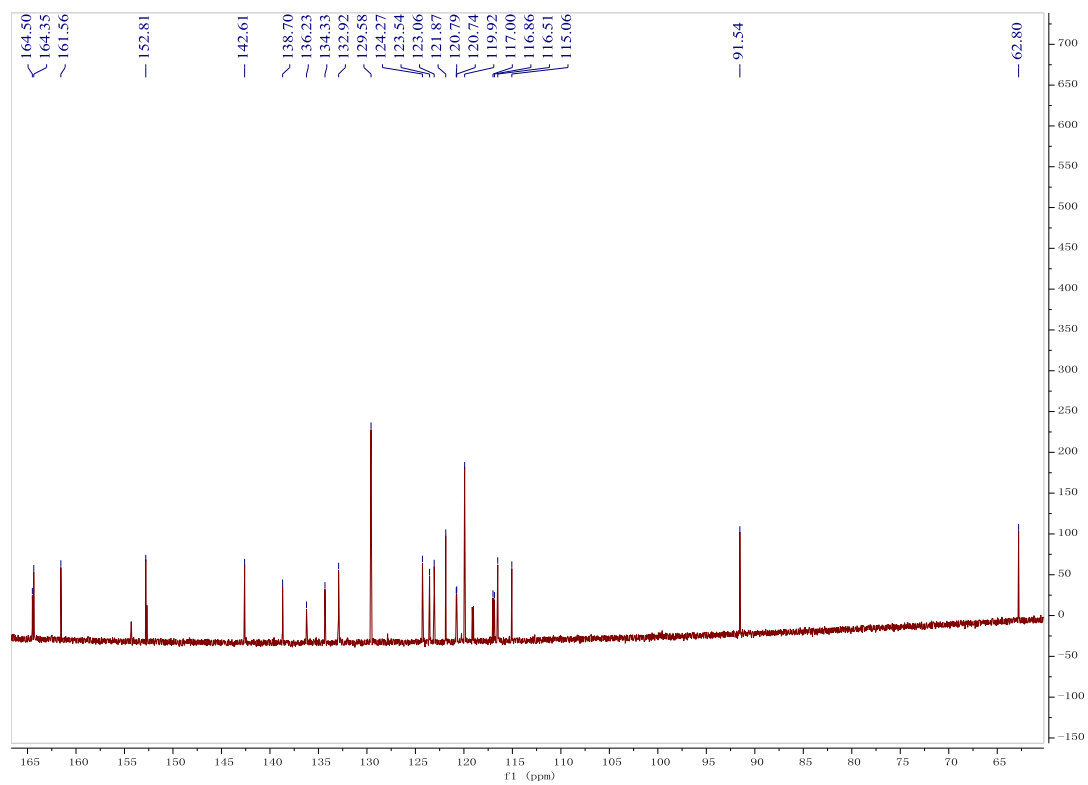



5m

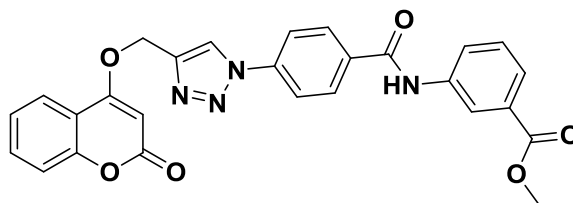

methyl 3-(4-(4-(((2-oxo-2H-chromen-4-yl)oxy)methyl)-1H-1,2,3-triazol-1-yl)benzamido)benzoate

HRMS of 5m

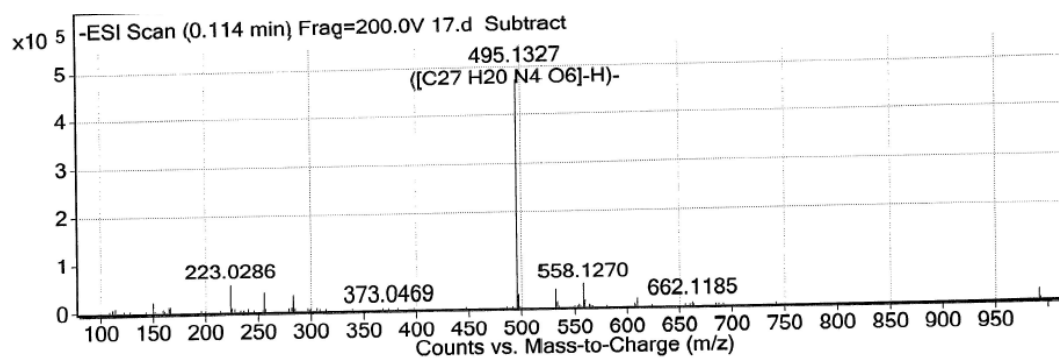

<sup>1</sup>H NMR of 5m

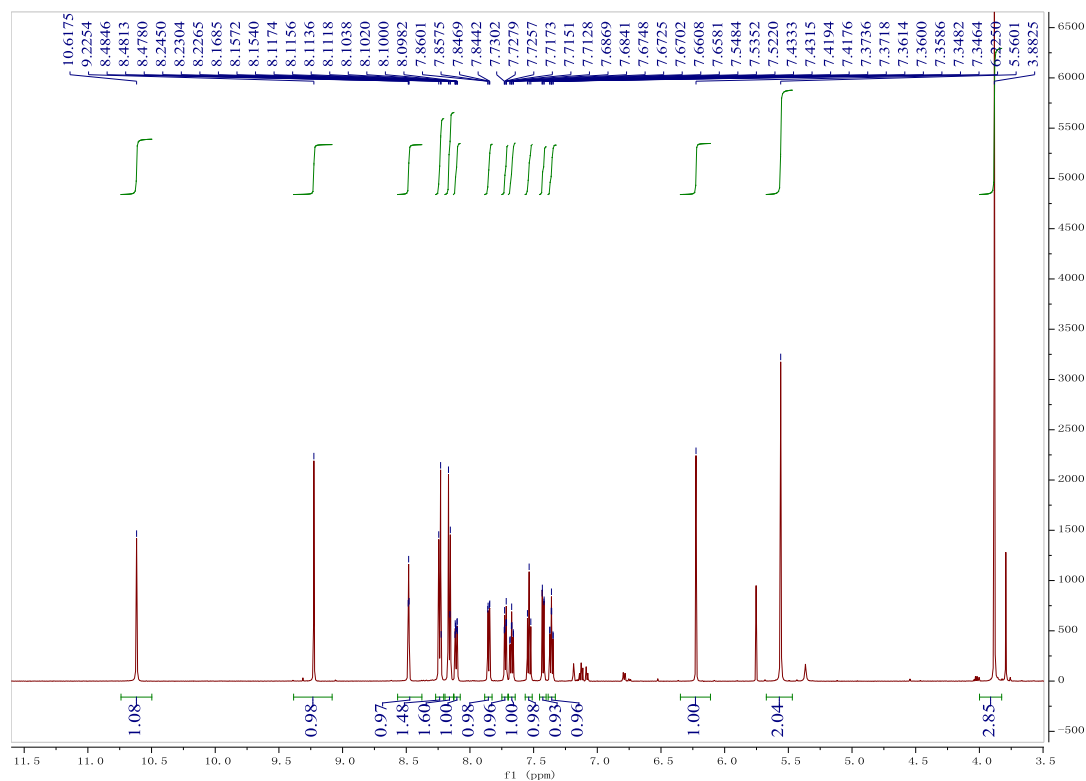

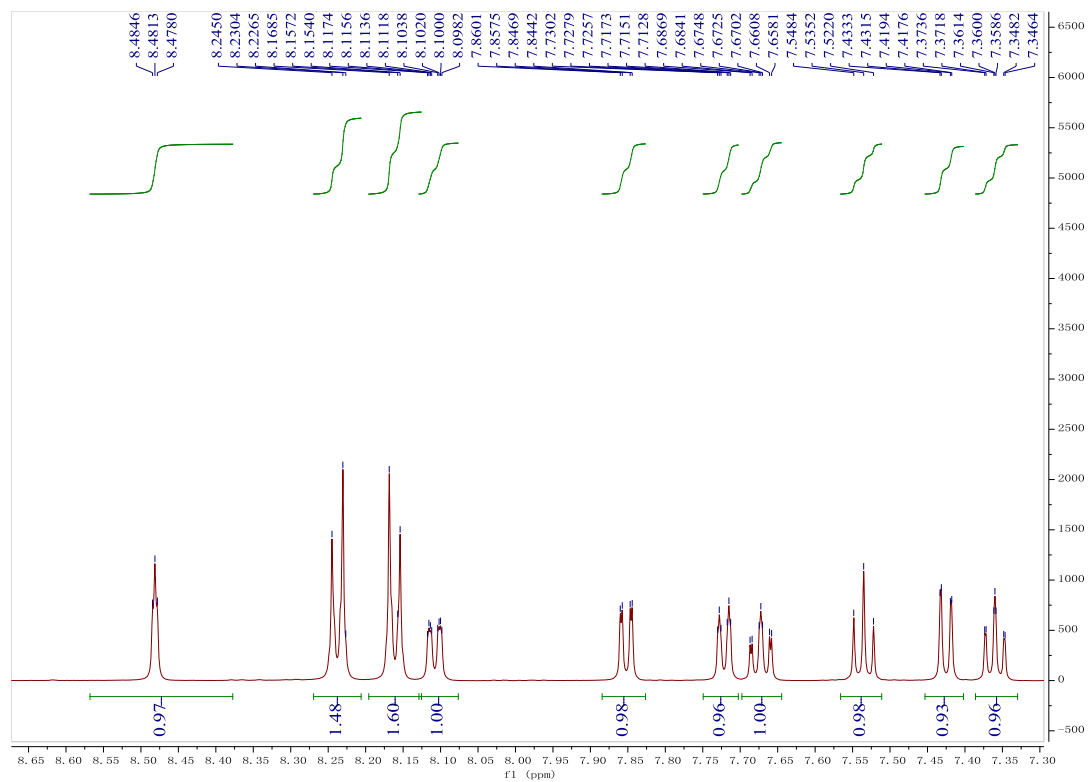

### <sup>13</sup>C NMR of 5m

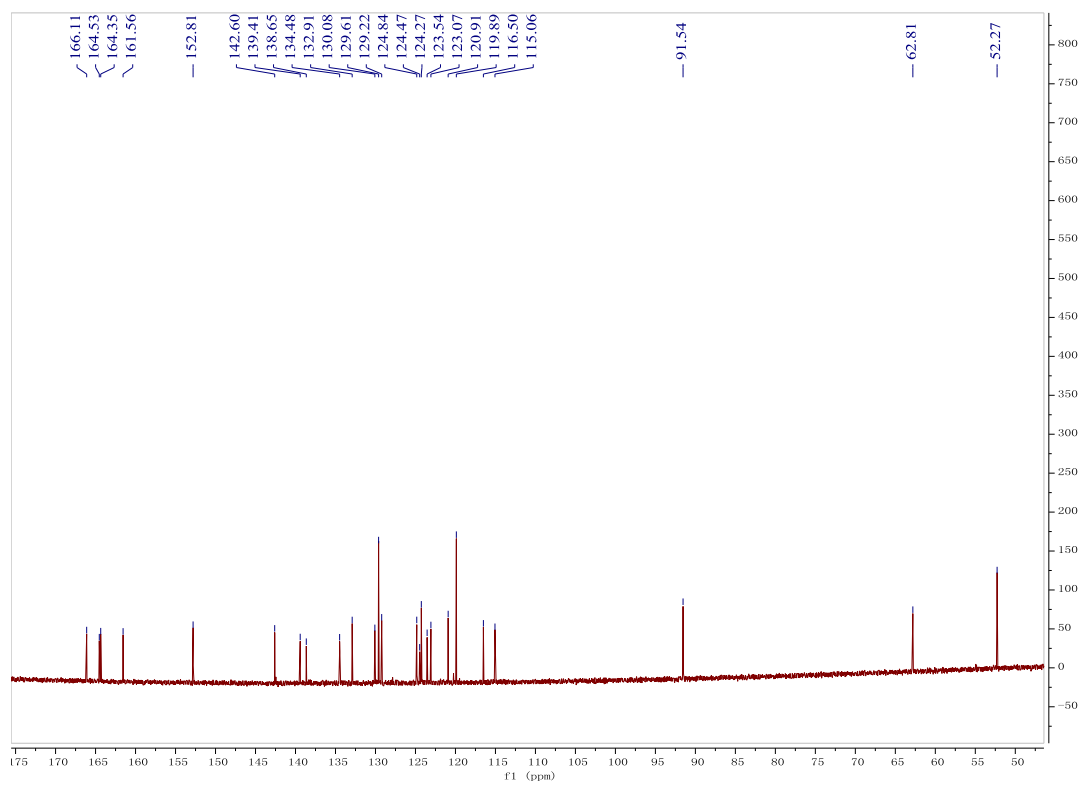

5n

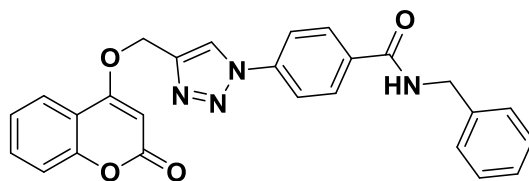

**N-benzyl-4-(4-((2-oxo-2H-chromen-4-yl)oxy)methyl)-  
1H-1,2,3-triazol-1-yl)benzamide**

HRMS of 5n

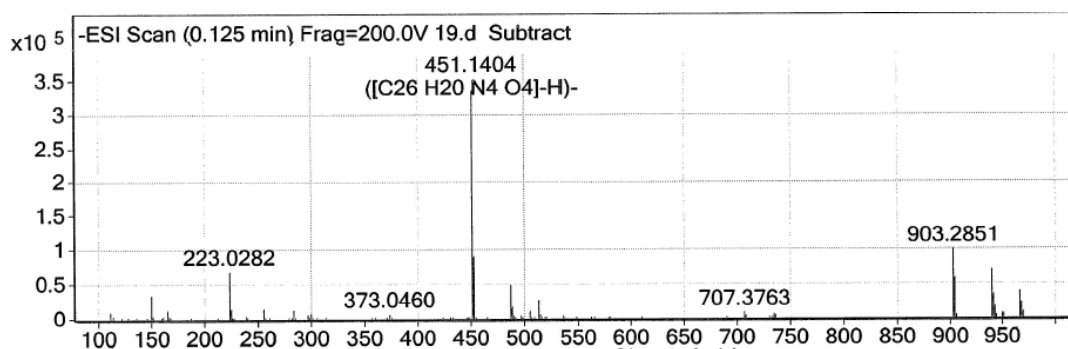

<sup>1</sup>H NMR of 5n

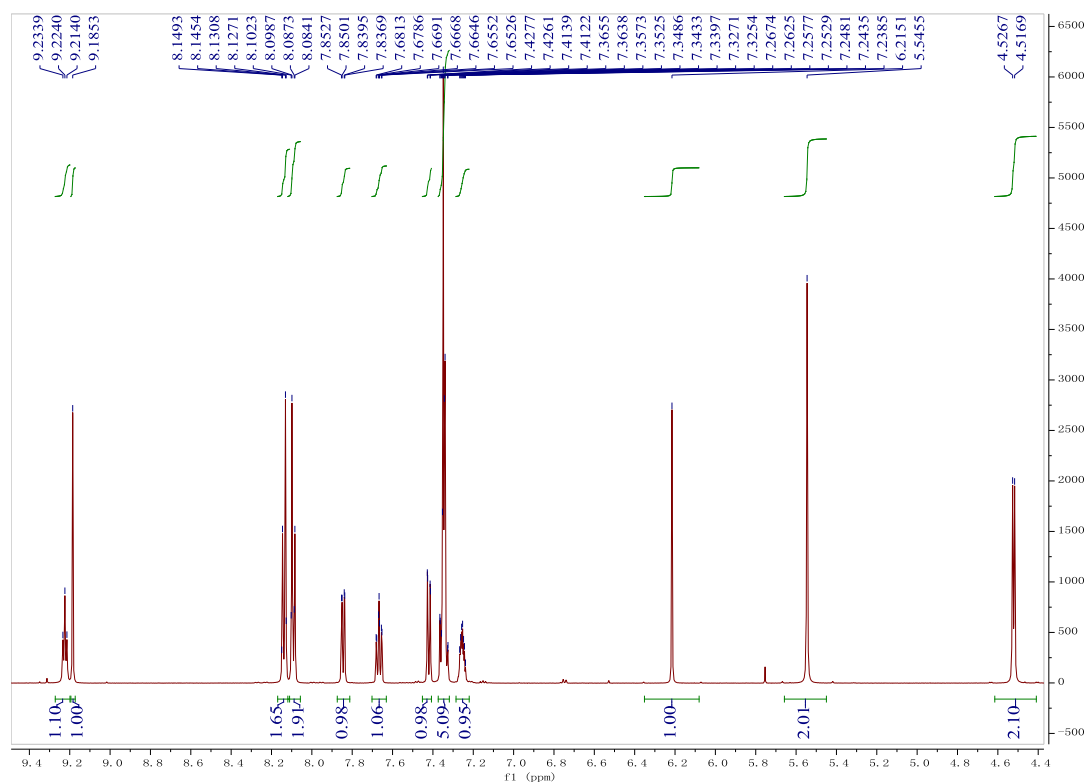

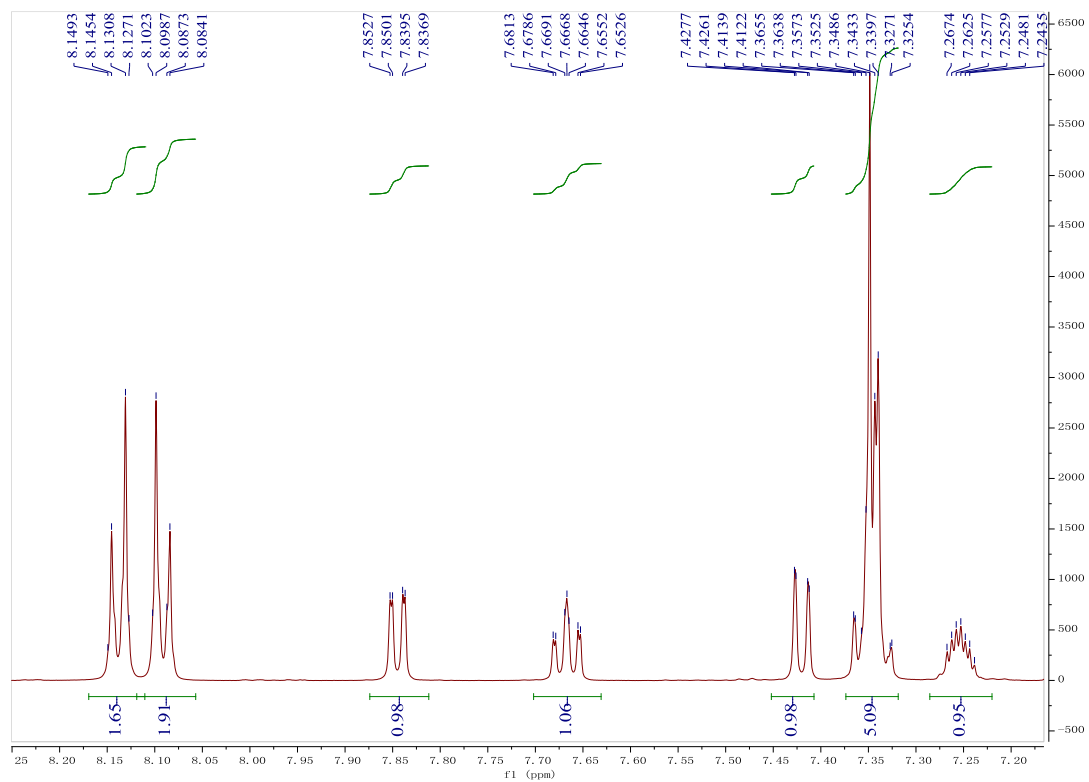

### <sup>13</sup>C NMR of 5n

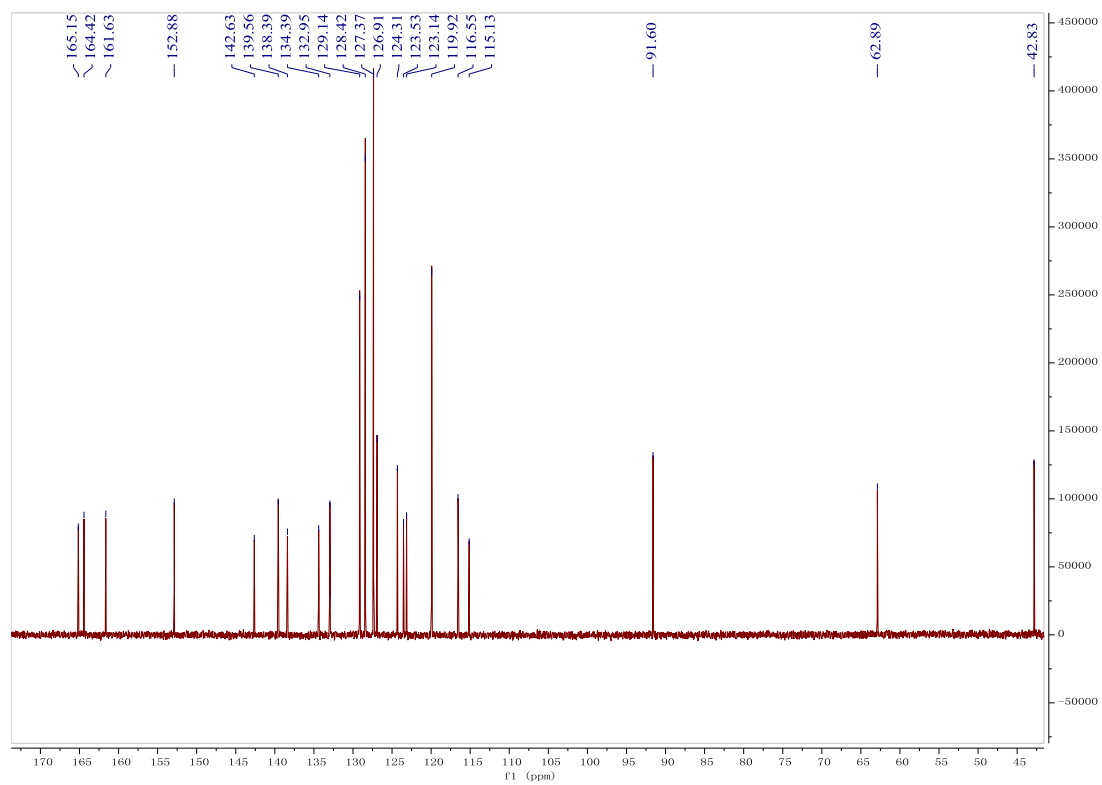

50

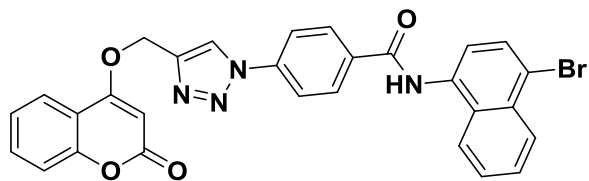

*N*-(4-bromonaphthalen-1-yl)-4-(((2-oxo-2H-chromen-4-yl)oxy)methyl)-1H-1,2,3-triazol-1-ylbenzamide

### HRMS of 50

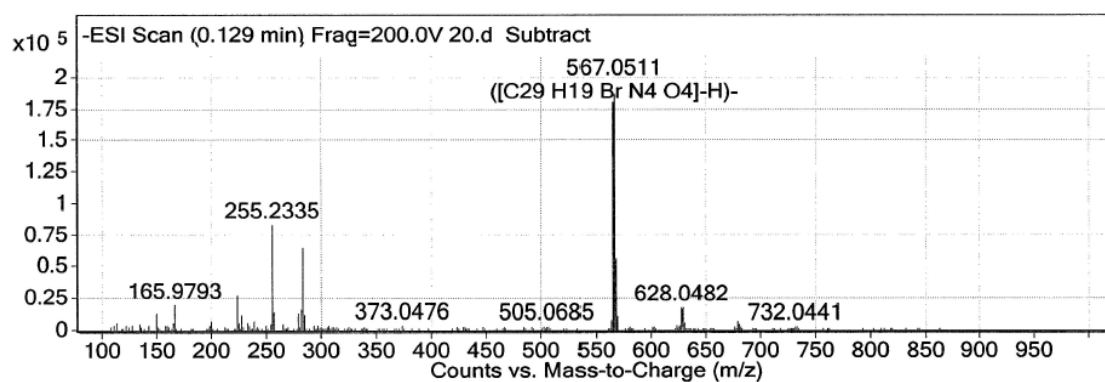

### <sup>1</sup>H NMR of 50

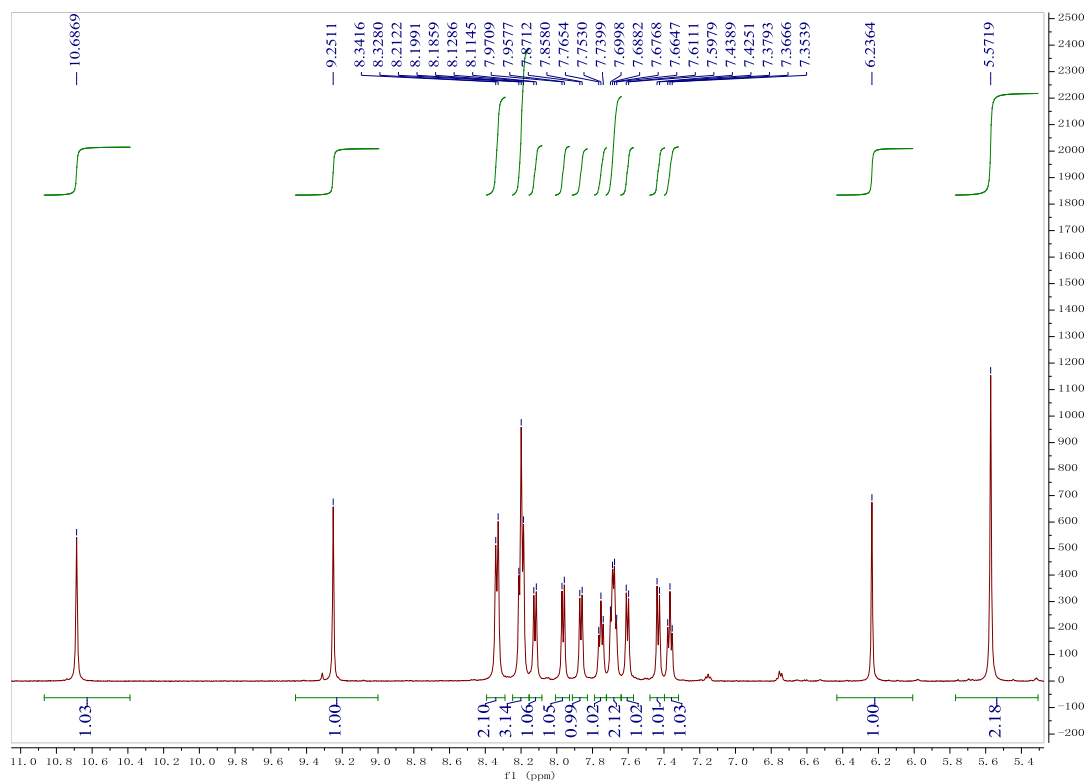

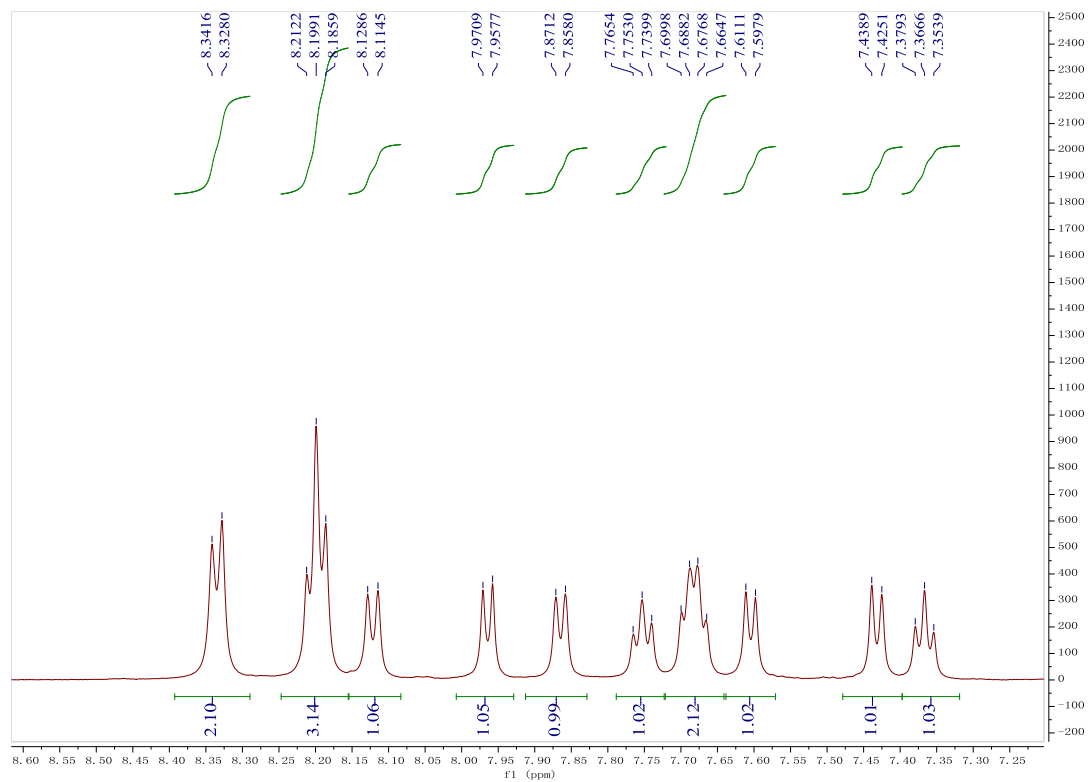

### <sup>13</sup>C NMR of 50

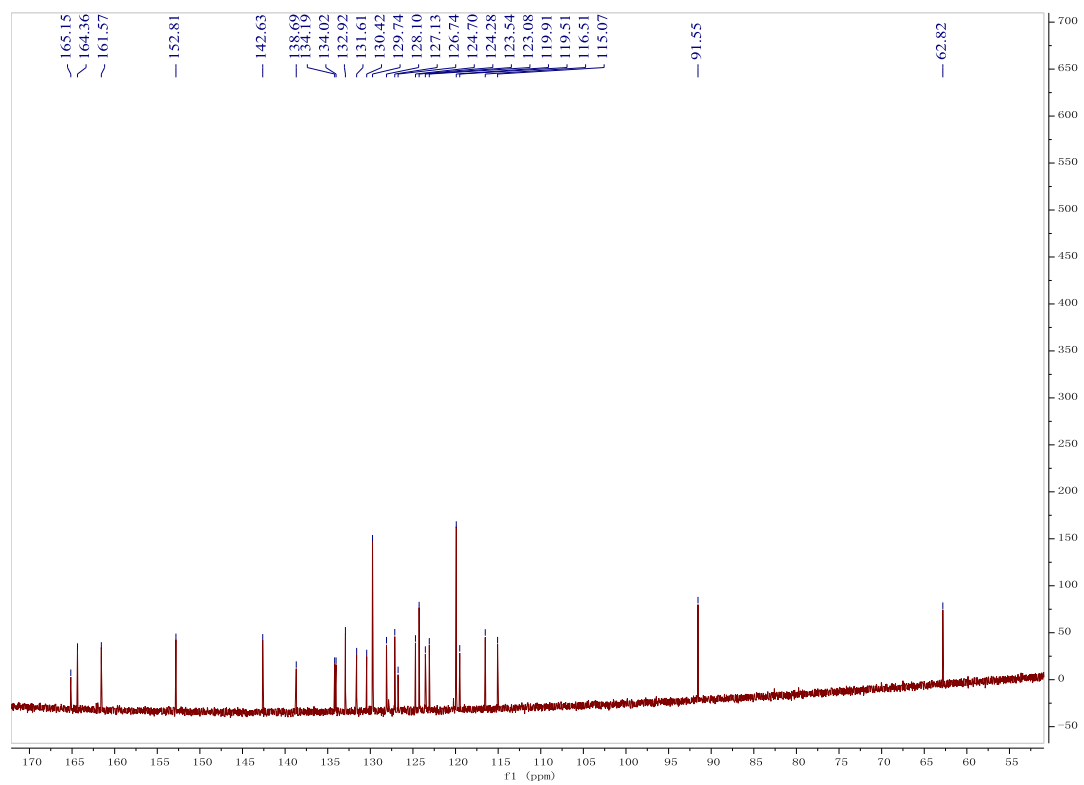

Supplement: molecules-23-02281-s001.pdf [file molecules-23-02281-s001.pdf]
